# Supplementary material
Source: PubMed Central journal article supplement (PMC4314595)

# **Age-Dependent Changes in Health Status in the Childhood Cancer Survivor Cohort**

**Hudson, et al**

**Table 1a. Baseline characteristics of survivors by questionnaire completion status**

|                                    |              | Total<br>N | Baseline<br>(N=9711)<br>% | 2003<br>Questionnaire<br>(N=6875)<br>% | 2007<br>Questionnaire<br>(N=5982)<br>% | Baseline<br>vs.<br>2003*<br>p-value | Baseline<br>vs.<br>2007*<br>p-value | 2003<br>vs.<br>2007*<br>p-value |
|------------------------------------|--------------|------------|---------------------------|----------------------------------------|----------------------------------------|-------------------------------------|-------------------------------------|---------------------------------|
| Sex                                | Male         | 5176       | 53.3                      | 51.2                                   | 50.6                                   | 0.0145                              | 0.002                               | 0.5047                          |
|                                    | Female       | 4535       | 46.7                      | 48.8                                   | 49.4                                   |                                     |                                     |                                 |
| Race/ethnicity                     | White        | 8543       | 87.1                      | 89.7                                   | 90.5                                   | <.0001                              | <.0001                              | 0.5750                          |
|                                    | Black        | 432        | 4.5                       | 3.3                                    | 2.9                                    |                                     |                                     |                                 |
|                                    | Hispanic     | 507        | 5.2                       | 4.2                                    | 4.1                                    |                                     |                                     |                                 |
|                                    | Other        | 284        | 2.9                       | 2.5                                    | 2.2                                    |                                     |                                     |                                 |
|                                    | Not reported | 35         | 0.4                       | 0.1                                    | 0.4                                    |                                     |                                     |                                 |
| High school graduate               | Yes          | 8185       | 84.3                      | 86.6                                   | 87.9                                   | 0.0008                              | <.0001                              | 0.1101                          |
|                                    | No           | 1002       | 10.3                      | 8.5                                    | 7.5                                    |                                     |                                     |                                 |
|                                    | Not reported | 524        | 5.4                       | 4.9                                    | 4.6                                    |                                     |                                     |                                 |
| Annual household income            | < \$20,000   | 1919       | 19.8                      | 18.2                                   | 17.4                                   | <.0001                              | <.0001                              | 0.1926                          |
|                                    | ≥ \$20,000   | 6589       | 67.9                      | 71.4                                   | 73.0                                   |                                     |                                     |                                 |
|                                    | Not reported | 1203       | 12.4                      | 10.4                                   | 9.6                                    |                                     |                                     |                                 |
| Health insurance                   | Yes/Canadian | 8076       | 83.2                      | 84.7                                   | 85.4                                   | 0.0249                              | 0.0005                              | 0.5099                          |
|                                    | No           | 1472       | 15.2                      | 13.8                                   | 13.2                                   |                                     |                                     |                                 |
|                                    | Not reported | 163        | 1.7                       | 1.5                                    | 1.4                                    |                                     |                                     |                                 |
| Body Mass Index, kg/m <sup>2</sup> | Underweight  | 627        | 6.5                       | 6.1                                    | 5.9                                    | 0.9919                              | 0.8383                              | 0.9407                          |
|                                    | Normal       | 5336       | 55.2                      | 55.4                                   | 56.0                                   |                                     |                                     |                                 |
|                                    | Overweight   | 2525       | 26.0                      | 26.3                                   | 26.2                                   |                                     |                                     |                                 |
|                                    | Obese        | 1203       | 12.4                      | 12.3                                   | 11.9                                   |                                     |                                     |                                 |

|                                                     |                           | <b>Total<br/>N</b> | <b>Baseline<br/>(N=9711)<br/>%</b> | <b>2003<br/>Questionnaire<br/>(N=6875)<br/>%</b> | <b>2007<br/>Questionnaire<br/>(N=5982)<br/>%</b> | <b>Baseline<br/>vs.<br/>2003*<br/>p-value</b> | <b>Baseline<br/>vs.<br/>2007*<br/>p-value</b> | <b>2003<br/>vs.<br/>2007*<br/>p-value</b> |                |       |      |      |      |      |       |        |       |        |      |      |      |      |         |      |      |      |      |                                                     |     |      |      |      |      |       |       |       |    |      |      |      |      |                              |     |      |      |      |      |       |       |       |             |     |     |     |     |                            |           |      |      |      |      |       |       |       |           |      |      |      |      |           |      |      |      |      |           |     |     |     |     |           |     |     |     |     |         |    |     |     |     |                         |                           |              |              |              |              |       |       |       |       |         |         |         |         |                                   |                           |               |               |               |               |       |       |       |       |
|-----------------------------------------------------|---------------------------|--------------------|------------------------------------|--------------------------------------------------|--------------------------------------------------|-----------------------------------------------|-----------------------------------------------|-------------------------------------------|----------------|-------|------|------|------|------|-------|--------|-------|--------|------|------|------|------|---------|------|------|------|------|-----------------------------------------------------|-----|------|------|------|------|-------|-------|-------|----|------|------|------|------|------------------------------|-----|------|------|------|------|-------|-------|-------|-------------|-----|-----|-----|-----|----------------------------|-----------|------|------|------|------|-------|-------|-------|-----------|------|------|------|------|-----------|------|------|------|------|-----------|-----|-----|-----|-----|-----------|-----|-----|-----|-----|---------|----|-----|-----|-----|-------------------------|---------------------------|--------------|--------------|--------------|--------------|-------|-------|-------|-------|---------|---------|---------|---------|-----------------------------------|---------------------------|---------------|---------------|---------------|---------------|-------|-------|-------|-------|
| Heavy/binge drinker                                 | Yes                       | 982                | 10.2                               | 10.5                                             | 10.7                                             | 0.645                                         | 0.541                                         | 0.917                                     |                |       |      |      |      |      |       |        |       |        |      |      |      |      |         |      |      |      |      |                                                     |     |      |      |      |      |       |       |       |    |      |      |      |      |                              |     |      |      |      |      |       |       |       |             |     |     |     |     |                            |           |      |      |      |      |       |       |       |           |      |      |      |      |           |      |      |      |      |           |     |     |     |     |           |     |     |     |     |         |    |     |     |     |                         |                           |              |              |              |              |       |       |       |       |         |         |         |         |                                   |                           |               |               |               |               |       |       |       |       |
|                                                     | No                        | 8694               | 89.9                               | 89.5                                             | 89.3                                             |                                               |                                               |                                           | Smoking status | Never | 6771 | 70.1 | 72.3 | 73.0 | 0.013 | <.0001 | 0.404 | Former | 1078 | 11.2 | 10.9 | 11.0 | Current | 1813 | 18.8 | 16.9 | 16.0 | Meets CDC physical activity guidelines <sup>†</sup> | Yes | 5855 | 63.3 | 64.6 | 65.5 | 0.405 | 0.131 | 0.624 | No | 3395 | 36.7 | 35.4 | 34.5 | Grade 3-4 chronic conditions | One | 2247 | 23.1 | 23.9 | 24.3 | 0.382 | 0.148 | 0.535 | Two or more | 710 | 7.3 | 7.5 | 7.8 | Age group at questionnaire | Age 18-24 | 4020 | 41.4 | 41.0 | 40.3 | 0.530 | 0.098 | 0.892 | Age 25-29 | 2578 | 26.6 | 27.0 | 27.6 | Age 30-34 | 1896 | 19.5 | 19.2 | 19.4 | Age 35-39 | 897 | 9.2 | 9.6 | 9.6 | Age 40-44 | 295 | 3.0 | 2.9 | 2.7 | Age 45+ | 25 | 0.3 | 0.3 | 0.3 | Age at diagnosis, years | Mean (standard deviation) | 9.4<br>(5.6) | 9.4<br>(5.6) | 9.5<br>(5.6) | 9.6<br>(5.6) | 0.036 | 0.001 | 0.150 | Range | (0, 20) | (0, 20) | (0, 20) | (0, 20) | Time from cancer diagnosis, years | Mean (standard deviation) | 16.8<br>(4.6) | 16.8<br>(4.6) | 16.8<br>(4.6) | 16.8<br>(4.6) | 0.483 | 0.712 | 0.753 | Range |
| Smoking status                                      | Never                     | 6771               | 70.1                               | 72.3                                             | 73.0                                             | 0.013                                         | <.0001                                        | 0.404                                     |                |       |      |      |      |      |       |        |       |        |      |      |      |      |         |      |      |      |      |                                                     |     |      |      |      |      |       |       |       |    |      |      |      |      |                              |     |      |      |      |      |       |       |       |             |     |     |     |     |                            |           |      |      |      |      |       |       |       |           |      |      |      |      |           |      |      |      |      |           |     |     |     |     |           |     |     |     |     |         |    |     |     |     |                         |                           |              |              |              |              |       |       |       |       |         |         |         |         |                                   |                           |               |               |               |               |       |       |       |       |
|                                                     | Former                    | 1078               | 11.2                               | 10.9                                             | 11.0                                             |                                               |                                               |                                           |                |       |      |      |      |      |       |        |       |        |      |      |      |      |         |      |      |      |      |                                                     |     |      |      |      |      |       |       |       |    |      |      |      |      |                              |     |      |      |      |      |       |       |       |             |     |     |     |     |                            |           |      |      |      |      |       |       |       |           |      |      |      |      |           |      |      |      |      |           |     |     |     |     |           |     |     |     |     |         |    |     |     |     |                         |                           |              |              |              |              |       |       |       |       |         |         |         |         |                                   |                           |               |               |               |               |       |       |       |       |
|                                                     | Current                   | 1813               | 18.8                               | 16.9                                             | 16.0                                             |                                               |                                               |                                           |                |       |      |      |      |      |       |        |       |        |      |      |      |      |         |      |      |      |      |                                                     |     |      |      |      |      |       |       |       |    |      |      |      |      |                              |     |      |      |      |      |       |       |       |             |     |     |     |     |                            |           |      |      |      |      |       |       |       |           |      |      |      |      |           |      |      |      |      |           |     |     |     |     |           |     |     |     |     |         |    |     |     |     |                         |                           |              |              |              |              |       |       |       |       |         |         |         |         |                                   |                           |               |               |               |               |       |       |       |       |
| Meets CDC physical activity guidelines <sup>†</sup> | Yes                       | 5855               | 63.3                               | 64.6                                             | 65.5                                             | 0.405                                         | 0.131                                         | 0.624                                     |                |       |      |      |      |      |       |        |       |        |      |      |      |      |         |      |      |      |      |                                                     |     |      |      |      |      |       |       |       |    |      |      |      |      |                              |     |      |      |      |      |       |       |       |             |     |     |     |     |                            |           |      |      |      |      |       |       |       |           |      |      |      |      |           |      |      |      |      |           |     |     |     |     |           |     |     |     |     |         |    |     |     |     |                         |                           |              |              |              |              |       |       |       |       |         |         |         |         |                                   |                           |               |               |               |               |       |       |       |       |
|                                                     | No                        | 3395               | 36.7                               | 35.4                                             | 34.5                                             |                                               |                                               |                                           |                |       |      |      |      |      |       |        |       |        |      |      |      |      |         |      |      |      |      |                                                     |     |      |      |      |      |       |       |       |    |      |      |      |      |                              |     |      |      |      |      |       |       |       |             |     |     |     |     |                            |           |      |      |      |      |       |       |       |           |      |      |      |      |           |      |      |      |      |           |     |     |     |     |           |     |     |     |     |         |    |     |     |     |                         |                           |              |              |              |              |       |       |       |       |         |         |         |         |                                   |                           |               |               |               |               |       |       |       |       |
| Grade 3-4 chronic conditions                        | One                       | 2247               | 23.1                               | 23.9                                             | 24.3                                             | 0.382                                         | 0.148                                         | 0.535                                     |                |       |      |      |      |      |       |        |       |        |      |      |      |      |         |      |      |      |      |                                                     |     |      |      |      |      |       |       |       |    |      |      |      |      |                              |     |      |      |      |      |       |       |       |             |     |     |     |     |                            |           |      |      |      |      |       |       |       |           |      |      |      |      |           |      |      |      |      |           |     |     |     |     |           |     |     |     |     |         |    |     |     |     |                         |                           |              |              |              |              |       |       |       |       |         |         |         |         |                                   |                           |               |               |               |               |       |       |       |       |
|                                                     | Two or more               | 710                | 7.3                                | 7.5                                              | 7.8                                              |                                               |                                               |                                           |                |       |      |      |      |      |       |        |       |        |      |      |      |      |         |      |      |      |      |                                                     |     |      |      |      |      |       |       |       |    |      |      |      |      |                              |     |      |      |      |      |       |       |       |             |     |     |     |     |                            |           |      |      |      |      |       |       |       |           |      |      |      |      |           |      |      |      |      |           |     |     |     |     |           |     |     |     |     |         |    |     |     |     |                         |                           |              |              |              |              |       |       |       |       |         |         |         |         |                                   |                           |               |               |               |               |       |       |       |       |
| Age group at questionnaire                          | Age 18-24                 | 4020               | 41.4                               | 41.0                                             | 40.3                                             | 0.530                                         | 0.098                                         | 0.892                                     |                |       |      |      |      |      |       |        |       |        |      |      |      |      |         |      |      |      |      |                                                     |     |      |      |      |      |       |       |       |    |      |      |      |      |                              |     |      |      |      |      |       |       |       |             |     |     |     |     |                            |           |      |      |      |      |       |       |       |           |      |      |      |      |           |      |      |      |      |           |     |     |     |     |           |     |     |     |     |         |    |     |     |     |                         |                           |              |              |              |              |       |       |       |       |         |         |         |         |                                   |                           |               |               |               |               |       |       |       |       |
|                                                     | Age 25-29                 | 2578               | 26.6                               | 27.0                                             | 27.6                                             |                                               |                                               |                                           |                |       |      |      |      |      |       |        |       |        |      |      |      |      |         |      |      |      |      |                                                     |     |      |      |      |      |       |       |       |    |      |      |      |      |                              |     |      |      |      |      |       |       |       |             |     |     |     |     |                            |           |      |      |      |      |       |       |       |           |      |      |      |      |           |      |      |      |      |           |     |     |     |     |           |     |     |     |     |         |    |     |     |     |                         |                           |              |              |              |              |       |       |       |       |         |         |         |         |                                   |                           |               |               |               |               |       |       |       |       |
|                                                     | Age 30-34                 | 1896               | 19.5                               | 19.2                                             | 19.4                                             |                                               |                                               |                                           |                |       |      |      |      |      |       |        |       |        |      |      |      |      |         |      |      |      |      |                                                     |     |      |      |      |      |       |       |       |    |      |      |      |      |                              |     |      |      |      |      |       |       |       |             |     |     |     |     |                            |           |      |      |      |      |       |       |       |           |      |      |      |      |           |      |      |      |      |           |     |     |     |     |           |     |     |     |     |         |    |     |     |     |                         |                           |              |              |              |              |       |       |       |       |         |         |         |         |                                   |                           |               |               |               |               |       |       |       |       |
|                                                     | Age 35-39                 | 897                | 9.2                                | 9.6                                              | 9.6                                              |                                               |                                               |                                           |                |       |      |      |      |      |       |        |       |        |      |      |      |      |         |      |      |      |      |                                                     |     |      |      |      |      |       |       |       |    |      |      |      |      |                              |     |      |      |      |      |       |       |       |             |     |     |     |     |                            |           |      |      |      |      |       |       |       |           |      |      |      |      |           |      |      |      |      |           |     |     |     |     |           |     |     |     |     |         |    |     |     |     |                         |                           |              |              |              |              |       |       |       |       |         |         |         |         |                                   |                           |               |               |               |               |       |       |       |       |
|                                                     | Age 40-44                 | 295                | 3.0                                | 2.9                                              | 2.7                                              |                                               |                                               |                                           |                |       |      |      |      |      |       |        |       |        |      |      |      |      |         |      |      |      |      |                                                     |     |      |      |      |      |       |       |       |    |      |      |      |      |                              |     |      |      |      |      |       |       |       |             |     |     |     |     |                            |           |      |      |      |      |       |       |       |           |      |      |      |      |           |      |      |      |      |           |     |     |     |     |           |     |     |     |     |         |    |     |     |     |                         |                           |              |              |              |              |       |       |       |       |         |         |         |         |                                   |                           |               |               |               |               |       |       |       |       |
|                                                     | Age 45+                   | 25                 | 0.3                                | 0.3                                              | 0.3                                              |                                               |                                               |                                           |                |       |      |      |      |      |       |        |       |        |      |      |      |      |         |      |      |      |      |                                                     |     |      |      |      |      |       |       |       |    |      |      |      |      |                              |     |      |      |      |      |       |       |       |             |     |     |     |     |                            |           |      |      |      |      |       |       |       |           |      |      |      |      |           |      |      |      |      |           |     |     |     |     |           |     |     |     |     |         |    |     |     |     |                         |                           |              |              |              |              |       |       |       |       |         |         |         |         |                                   |                           |               |               |               |               |       |       |       |       |
| Age at diagnosis, years                             | Mean (standard deviation) | 9.4<br>(5.6)       | 9.4<br>(5.6)                       | 9.5<br>(5.6)                                     | 9.6<br>(5.6)                                     | 0.036                                         | 0.001                                         | 0.150                                     |                |       |      |      |      |      |       |        |       |        |      |      |      |      |         |      |      |      |      |                                                     |     |      |      |      |      |       |       |       |    |      |      |      |      |                              |     |      |      |      |      |       |       |       |             |     |     |     |     |                            |           |      |      |      |      |       |       |       |           |      |      |      |      |           |      |      |      |      |           |     |     |     |     |           |     |     |     |     |         |    |     |     |     |                         |                           |              |              |              |              |       |       |       |       |         |         |         |         |                                   |                           |               |               |               |               |       |       |       |       |
|                                                     | Range                     | (0, 20)            | (0, 20)                            | (0, 20)                                          | (0, 20)                                          |                                               |                                               |                                           |                |       |      |      |      |      |       |        |       |        |      |      |      |      |         |      |      |      |      |                                                     |     |      |      |      |      |       |       |       |    |      |      |      |      |                              |     |      |      |      |      |       |       |       |             |     |     |     |     |                            |           |      |      |      |      |       |       |       |           |      |      |      |      |           |      |      |      |      |           |     |     |     |     |           |     |     |     |     |         |    |     |     |     |                         |                           |              |              |              |              |       |       |       |       |         |         |         |         |                                   |                           |               |               |               |               |       |       |       |       |
| Time from cancer diagnosis, years                   | Mean (standard deviation) | 16.8<br>(4.6)      | 16.8<br>(4.6)                      | 16.8<br>(4.6)                                    | 16.8<br>(4.6)                                    | 0.483                                         | 0.712                                         | 0.753                                     |                |       |      |      |      |      |       |        |       |        |      |      |      |      |         |      |      |      |      |                                                     |     |      |      |      |      |       |       |       |    |      |      |      |      |                              |     |      |      |      |      |       |       |       |             |     |     |     |     |                            |           |      |      |      |      |       |       |       |           |      |      |      |      |           |      |      |      |      |           |     |     |     |     |           |     |     |     |     |         |    |     |     |     |                         |                           |              |              |              |              |       |       |       |       |         |         |         |         |                                   |                           |               |               |               |               |       |       |       |       |
|                                                     | Range                     | (6, 31)            | (6, 31)                            | (6, 31)                                          | (6, 31)                                          |                                               |                                               |                                           |                |       |      |      |      |      |       |        |       |        |      |      |      |      |         |      |      |      |      |                                                     |     |      |      |      |      |       |       |       |    |      |      |      |      |                              |     |      |      |      |      |       |       |       |             |     |     |     |     |                            |           |      |      |      |      |       |       |       |           |      |      |      |      |           |      |      |      |      |           |     |     |     |     |           |     |     |     |     |         |    |     |     |     |                         |                           |              |              |              |              |       |       |       |       |         |         |         |         |                                   |                           |               |               |               |               |       |       |       |       |

|                                     |                                   | <b>Total<br/>N</b> | <b>Baseline<br/>(N=9711)<br/>%</b> | <b>2003<br/>Questionnaire<br/>(N=6875)<br/>%</b> | <b>2007<br/>Questionnaire<br/>(N=5982)<br/>%</b> | <b>Baseline<br/>vs.<br/>2003*<br/>p-value</b> | <b>Baseline<br/>vs.<br/>2007*<br/>p-value</b> | <b>2003<br/>vs.<br/>2007*<br/>p-value</b> |
|-------------------------------------|-----------------------------------|--------------------|------------------------------------|--------------------------------------------------|--------------------------------------------------|-----------------------------------------------|-----------------------------------------------|-------------------------------------------|
| Diagnosis                           | Leukemia                          | 2918               | 30.1                               | 30.4                                             | 30.8                                             | 0.905                                         | 0.860                                         | 0.994                                     |
|                                     | Central nervous system malignancy | 1223               | 12.6                               | 12.5                                             | 12.0                                             |                                               |                                               |                                           |
|                                     | Hodgkin lymphoma                  | 1682               | 17.3                               | 17.0                                             | 17.1                                             |                                               |                                               |                                           |
|                                     | Non-Hodgkin lymphoma              | 885                | 9.1                                | 8.9                                              | 9.1                                              |                                               |                                               |                                           |
|                                     | Wilms tumor                       | 656                | 6.8                                | 6.6                                              | 6.7                                              |                                               |                                               |                                           |
|                                     | Neuroblastoma                     | 408                | 4.2                                | 4.0                                              | 4.0                                              |                                               |                                               |                                           |
|                                     | Soft tissue sarcoma               | 916                | 9.4                                | 9.9                                              | 9.7                                              |                                               |                                               |                                           |
|                                     | Bone malignancy                   | 1023               | 10.5                               | 10.8                                             | 10.7                                             |                                               |                                               |                                           |
| Select chemotherapy exposures       | Anthracycline agents              | 3180               | 37.8                               | 37.8                                             | 38.1                                             | 0.843                                         | 0.827                                         | 0.983                                     |
|                                     | Alkylating agents                 | 4406               | 52.4                               | 51.8                                             | 51.7                                             | 0.771                                         | 0.777                                         | 0.996                                     |
| Brain radiation, maximum dose, Gray | None                              | 5679               | 67.1                               | 66.7                                             | 66.9                                             | 0.802                                         | 0.860                                         | 0.999                                     |
|                                     | 3.0-23.9                          | 772                | 9.1                                | 9.1                                              | 9.3                                              |                                               |                                               |                                           |
|                                     | 24.0-29.9                         | 1066               | 12.6                               | 13.0                                             | 13.1                                             |                                               |                                               |                                           |
|                                     | 30.0+                             | 947                | 11.2                               | 11.2                                             | 10.8                                             |                                               |                                               |                                           |
| Chest radiation, maximum dose, Gray | None                              | 6038               | 71.3                               | 71.7                                             | 71.9                                             | 0.691                                         | 0.406                                         | 0.864                                     |
|                                     | 62.0-23.9                         | 635                | 7.5                                | 7.3                                              | 7.5                                              |                                               |                                               |                                           |
|                                     | 24.0-37.9                         | 968                | 11.4                               | 11.5                                             | 11.2                                             |                                               |                                               |                                           |
|                                     | 38.0+                             | 823                | 9.7                                | 9.5                                              | 9.5                                              |                                               |                                               |                                           |

|                                            |                               | <b>Total<br/>N</b> | <b>Baseline<br/>(N=9711)<br/>%</b> | <b>2003<br/>Questionnaire<br/>(N=6875)<br/>%</b> | <b>2007<br/>Questionnaire<br/>(N=5982)<br/>%</b> | <b>Baseline<br/>vs.<br/>2003*<br/>p-value</b> | <b>Baseline<br/>vs.<br/>2007*<br/>p-value</b> | <b>2003<br/>vs.<br/>2007*<br/>p-value</b> |
|--------------------------------------------|-------------------------------|--------------------|------------------------------------|--------------------------------------------------|--------------------------------------------------|-----------------------------------------------|-----------------------------------------------|-------------------------------------------|
| Abdominal radiation,<br>maximum dose, Gray | None                          | 6266               | 74.0                               | 74.1                                             | 74.4                                             | 0.698                                         | 0.627                                         | 0.904                                     |
|                                            | 14.0-23.9                     | 598                | 7.1                                | 7.0                                              | 7.1                                              |                                               |                                               |                                           |
|                                            | 24.0-34.9                     | 709                | 8.4                                | 8.8                                              | 8.6                                              |                                               |                                               |                                           |
|                                            | 35.0+                         | 891                | 10.5                               | 10.1                                             | 9.9                                              |                                               |                                               |                                           |
| Pelvic radiation, maximum<br>dose, Gray    | None                          | 6722               | 79.4                               | 79.6                                             | 80.2                                             | 0.657                                         | 0.636                                         | 0.879                                     |
|                                            | 6.1-23.9                      | 461                | 5.5                                | 5.3                                              | 5.2                                              |                                               |                                               |                                           |
|                                            | 24-34.9                       | 555                | 6.6                                | 7.0                                              | 6.5                                              |                                               |                                               |                                           |
|                                            | 35.0+                         | 726                | 8.6                                | 8.2                                              | 8.1                                              |                                               |                                               |                                           |
| Surgery                                    | Craniotomy                    | 963                | 9.9                                | 10.5                                             | 10.1                                             | 0.085                                         | 0.304                                         | 0.593                                     |
|                                            | Thoracotomy                   | 413                | 4.3                                | 4.5                                              | 4.4                                              | 0.467                                         | 0.392                                         | 0.840                                     |
|                                            | Nephrectomy                   | 551                | 5.7                                | 5.9                                              | 6.0                                              | 0.901                                         | 0.672                                         | 0.819                                     |
|                                            | Cystectomy                    | 62                 | 0.6                                | 0.7                                              | 0.7                                              | 0.297                                         | 0.450                                         | 0.868                                     |
|                                            | Upper extremity<br>amputation | 44                 | 0.5                                | 0.5                                              | 0.4                                              | 0.795                                         | 0.931                                         | 0.795                                     |
|                                            | Lower extremity<br>amputation | 451                | 4.6                                | 5.1                                              | 4.9                                              | 0.380                                         | 0.552                                         | 0.825                                     |

\* 488 survivors who died between baseline and 2003, 708 survivors who died between baseline and 2007, and 220 survivors who died between 2003 and 2007 are not included in the calculation of the p-values from Chi-squared test categorical and Wilcoxon two-sample test for continuous variables.

† The equivalent of at least 150 minutes of moderate physical activity per week.

CDC=Centers for Disease Control and Prevention

**1b. Baseline characteristics of siblings by questionnaire completion status**

|                                    |              | Total<br>N | Baseline<br>(N=3206)<br>% | 2003<br>Questionnaire<br>(N=2351)<br>% | 2007<br>Questionnaire<br>(N=1947)<br>% | Baseline<br>vs.<br>2003*<br>p-value | Baseline<br>vs.<br>2007*<br>p-value | 2003<br>vs.<br>2007*<br>p-value |
|------------------------------------|--------------|------------|---------------------------|----------------------------------------|----------------------------------------|-------------------------------------|-------------------------------------|---------------------------------|
| Sex                                | Male         | 1519       | 47.4                      | 45.9                                   | 45.4                                   | 0.136                               | 0.180                               | 0.716                           |
|                                    | Female       | 1687       | 52.6                      | 54.1                                   | 54.7                                   |                                     |                                     |                                 |
| Race/ethnicity                     | White        | 2830       | 88.3                      | 89.5                                   | 90.3                                   | 0.571                               | 0.155                               | 0.882                           |
|                                    | Black        | 81         | 2.5                       | 2.0                                    | 2.0                                    |                                     |                                     |                                 |
|                                    | Hispanic     | 108        | 3.4                       | 2.8                                    | 2.4                                    |                                     |                                     |                                 |
|                                    | Other        | 79         | 2.5                       | 2.4                                    | 2.2                                    |                                     |                                     |                                 |
|                                    | Not reported | 108        | 3.4                       | 3.3                                    | 3.2                                    |                                     |                                     |                                 |
| High school graduate               | Yes          | 2876       | 89.7                      | 91.4                                   | 92.2                                   | 0.092                               | 0.011                               | 0.579                           |
|                                    | No           | 199        | 6.2                       | 4.9                                    | 4.5                                    |                                     |                                     |                                 |
|                                    | Not reported | 131        | 4.1                       | 3.7                                    | 3.2                                    |                                     |                                     |                                 |
| Annual household income            | < \$20,000   | 367        | 11.5                      | 9.7                                    | 9.7                                    | 0.003                               | 0.005                               | 0.996                           |
|                                    | ≥ \$20,000   | 2522       | 78.7                      | 82.5                                   | 82.5                                   |                                     |                                     |                                 |
|                                    | Not reported | 317        | 10.0                      | 7.8                                    | 7.8                                    |                                     |                                     |                                 |
| Health insurance                   | Yes/Canadian | 2823       | 88.1                      | 89.9                                   | 90.9                                   | 0.119                               | 0.007                               | 0.526                           |
|                                    | No           | 347        | 10.8                      | 9.3                                    | 8.4                                    |                                     |                                     |                                 |
|                                    | Not reported | 36         | 1.1                       | 0.9                                    | 0.7                                    |                                     |                                     |                                 |
| Body Mass Index, kg/m <sup>2</sup> | Underweight  | 144        | 3.6                       | 2.9                                    | 3.0                                    | 0.571                               | 0.606                               | 0.923                           |
|                                    | Normal       | 1693       | 52.8                      | 54.0                                   | 54.0                                   |                                     |                                     |                                 |
|                                    | Overweight   | 905        | 28.2                      | 27.8                                   | 28.4                                   |                                     |                                     |                                 |
|                                    | Obese        | 494        | 15.4                      | 15.3                                   | 14.6                                   |                                     |                                     |                                 |
| Heavy/binge drinker                | Yes          | 419        | 13.1                      | 13.3                                   | 13.8                                   | 0.871                               | 0.490                               | 0.620                           |
|                                    | No           | 2781       | 86.9                      | 86.7                                   | 86.2                                   |                                     |                                     |                                 |

|                                                     |             | <b>Total<br/>N</b> | <b>Baseline<br/>(N=3206)<br/>%</b> | <b>2003<br/>Questionnaire<br/>(N=2351)<br/>%</b> | <b>2007<br/>Questionnaire<br/>(N=1947)<br/>%</b> | <b>Baseline<br/>vs.<br/>2003*<br/>p-value</b> | <b>Baseline<br/>vs.<br/>2007*<br/>p-value</b> | <b>2003<br/>vs.<br/>2007*<br/>p-value</b> |
|-----------------------------------------------------|-------------|--------------------|------------------------------------|--------------------------------------------------|--------------------------------------------------|-----------------------------------------------|-----------------------------------------------|-------------------------------------------|
| Smoking status                                      | Never       | 1864               | 54.5                               | 60.3                                             | 61.0                                             | 0.276                                         | 0.060                                         | 0.689                                     |
|                                                     | Former      | 538                | 16.9                               | 16.9                                             | 17.4                                             |                                               |                                               |                                           |
|                                                     | Current     | 786                | 24.7                               | 22.8                                             | 21.6                                             |                                               |                                               |                                           |
| Meets CDC physical activity guidelines <sup>†</sup> | Yes         | 2104               | 66.5                               | 67.8                                             | 67.1                                             | 0.333                                         | 0.734                                         | 0.581                                     |
|                                                     | No          | 1060               | 33.5                               | 32.2                                             | 33.0                                             |                                               |                                               |                                           |
| Grade 3-4 chronic conditions                        | One         | 251                | 7.8                                | 8.0                                              | 8.5                                              | 0.735                                         | 0.668                                         | 0.473                                     |
|                                                     | Two or more | 40                 | 13                                 | 1.4                                              | 1.2                                              |                                               |                                               |                                           |
| Age group at questionnaire                          | Age 18-24   | 959                | 29.9                               | 28.8                                             | 27.4                                             | 0.967                                         | 0.532                                         | 0.904                                     |
|                                                     | Age 25-29   | 734                | 22.9                               | 23.2                                             | 23.9                                             |                                               |                                               |                                           |
|                                                     | Age 30-34   | 689                | 21.5                               | 22.1                                             | 21.9                                             |                                               |                                               |                                           |
|                                                     | Age 35-39   | 481                | 15.0                               | 15.2                                             | 15.6                                             |                                               |                                               |                                           |
|                                                     | Age 40-44   | 254                | 7.9                                | 8.0                                              | 8.3                                              |                                               |                                               |                                           |
|                                                     | Age 45+     | 89                 | 2.8                                | 2.7                                              | 2.9                                              |                                               |                                               |                                           |

\* 11 siblings who died between baseline and 2003, 16 siblings who died between baseline and 2007, and 5 siblings who died between 2003 and 2007 are not included in the calculation of the p-values from Chi-squared test categorical and Wilcoxon two-sample test for continuous variables.

<sup>†</sup> The equivalent of at least 150 minutes of moderate physical activity per week

CDC=Centers for Disease Control and Prevention

**Table 2. Percentage of survivors and siblings who reported moderate to extreme adverse health status by 5-year age groups (Overall)**

| Characteristic       | Age 18-24             |      |                      |      | Age 25-29             |      |                      |      | Age 30-34             |      |                      |      | Age 35-39             |      |                      |      | Age 40-44             |      |                      |      | Age 45+               |      |                     |      |
|----------------------|-----------------------|------|----------------------|------|-----------------------|------|----------------------|------|-----------------------|------|----------------------|------|-----------------------|------|----------------------|------|-----------------------|------|----------------------|------|-----------------------|------|---------------------|------|
|                      | Survivors<br>(N=4105) |      | Siblings<br>(N=1008) |      | Survivors<br>(N=4231) |      | Siblings<br>(N=1295) |      | Survivors<br>(N=5448) |      | Siblings<br>(N=1633) |      | Survivors<br>(N=4385) |      | Siblings<br>(N=1493) |      | Survivors<br>(N=2728) |      | Siblings<br>(N=1130) |      | Survivors<br>(N=1671) |      | Siblings<br>(N=945) |      |
|                      | n                     | %    | n                    | %    | n                     | %    | n                    | %    | n                     | %    | n                    | %    | n                     | %    | n                    | %    | n                     | %    | n                    | %    | n                     | %    | n                   | %    |
| General Health       | 384                   | 9.5  | 46                   | 4.8  | 511                   | 12.2 | 37                   | 4.2  | 700                   | 13.0 | 60                   | 5.2  | 615                   | 14.2 | 72                   | 7.0  | 424                   | 15.8 | 49                   | 6.6  | 305                   | 18.5 | 56                  | 8.3  |
| Mental Health        | 631                   | 17.4 | 117                  | 12.6 | 716                   | 18.4 | 146                  | 11.4 | 888                   | 17.6 | 160                  | 10.0 | 730                   | 17.6 | 153                  | 10.3 | 435                   | 16.8 | 111                  | 10.0 | 279                   | 17.3 | 102                 | 10.9 |
| Functional Health    | 494                   | 12.5 | 24                   | 2.5  | 617                   | 15.0 | 28                   | 3.2  | 895                   | 16.9 | 43                   | 3.8  | 807                   | 18.8 | 46                   | 4.5  | 532                   | 19.8 | 35                   | 4.7  | 339                   | 20.7 | 41                  | 6.1  |
| Activity Limitation  | 420                   | 10.6 | 46                   | 4.8  | 480                   | 11.6 | 46                   | 5.2  | 643                   | 12.0 | 61                   | 5.3  | 652                   | 15.0 | 63                   | 6.1  | 486                   | 18.0 | 57                   | 7.7  | 402                   | 24.2 | 70                  | 10.4 |
| Pain                 | 336                   | 8.7  | n/a                  | n/a  | 357                   | 9.3  | n/a                  | n/a  | 477                   | 9.6  | n/a                  | n/a  | 363                   | 8.9  | n/a                  | n/a  | 236                   | 9.2  | n/a                  | n/a  | 140                   | 8.7  | n/a                 | n/a  |
| Anxiety              | 482                   | 12.5 | n/a                  | n/a  | 484                   | 12.7 | n/a                  | n/a  | 642                   | 12.9 | n/a                  | n/a  | 523                   | 12.7 | n/a                  | n/a  | 349                   | 13.5 | n/a                  | n/a  | 214                   | 13.3 | n/a                 | n/a  |
| Any Domain (4)*      | 1267                  | 30.9 | 193                  | 19.1 | 1401                  | 33.2 | 210                  | 16.3 | 1845                  | 34.0 | 251                  | 15.5 | 1571                  | 35.9 | 257                  | 17.2 | 1010                  | 37.1 | 182                  | 16.2 | 696                   | 41.9 | 184                 | 19.5 |
| Any Domain (6)†      | 1556                  | 37.9 | n/a                  | n/a  | 1639                  | 38.8 | n/a                  | n/a  | 2192                  | 40.3 | n/a                  | n/a  | 1822                  | 41.6 | n/a                  | n/a  | 1157                  | 42.6 | n/a                  | n/a  | 782                   | 47.0 | n/a                 | n/a  |
| Health Status Score‡ |                       |      |                      |      |                       |      |                      |      |                       |      |                      |      |                       |      |                      |      |                       |      |                      |      |                       |      |                     |      |
| None                 | 2837                  | 69.1 | 815                  | 80.9 | 2825                  | 66.8 | 1082                 | 83.7 | 3588                  | 66.0 | 1373                 | 84.5 | 2806                  | 64.1 | 1233                 | 82.8 | 1709                  | 62.9 | 942                  | 83.8 | 967                   | 58.1 | 759                 | 80.5 |
| One domain           | 808                   | 19.7 | 159                  | 15.8 | 798                   | 18.9 | 175                  | 13.5 | 1047                  | 19.3 | 202                  | 12.4 | 817                   | 18.7 | 207                  | 13.9 | 491                   | 18.1 | 135                  | 12.0 | 336                   | 20.2 | 129                 | 13.7 |
| Two domains          | 297                   | 7.2  | 29                   | 2.9  | 354                   | 8.4  | 26                   | 2.0  | 428                   | 7.9  | 28                   | 1.7  | 408                   | 9.3  | 32                   | 2.1  | 261                   | 9.6  | 27                   | 2.4  | 167                   | 10.0 | 32                  | 3.4  |
| Three domains        | 121                   | 2.9  | 4                    | 0.4  | 178                   | 4.2  | 6                    | 0.5  | 257                   | 4.7  | 18                   | 1.1  | 213                   | 4.9  | 9                    | 0.6  | 168                   | 6.2  | 17                   | 1.5  | 117                   | 7.0  | 16                  | 1.7  |
| Four domains         | 41                    | 1.0  | 1                    | 0.1  | 71                    | 1.7  | 3                    | 0.2  | 113                   | 2.1  | 3                    | 0.2  | 133                   | 3.0  | 9                    | 0.6  | 90                    | 3.3  | 3                    | 0.3  | 76                    | 4.6  | 7                   | 0.7  |

\* Any domain (4) includes general, mental, functional and activity limitation

† Any domain (6) includes all domains

‡ Health status score includes general, mental, functional and activity limitation

n/a = Not applicable



**Table 3. Percentage of survivors and siblings who reported moderate to extreme adverse health status by 5-year age groups (Male)**

| Characteristic       | Age 18-24             |      |                      |      | Age 25-29             |      |                      |      | Age 30-34             |      |                      |      | Age 35-39             |      |                      |      | Age 40-44             |      |                      |      | Age 45+               |      |                     |      |
|----------------------|-----------------------|------|----------------------|------|-----------------------|------|----------------------|------|-----------------------|------|----------------------|------|-----------------------|------|----------------------|------|-----------------------|------|----------------------|------|-----------------------|------|---------------------|------|
|                      | Survivors<br>(N=4105) |      | Siblings<br>(N=1008) |      | Survivors<br>(N=4231) |      | Siblings<br>(N=1295) |      | Survivors<br>(N=5448) |      | Siblings<br>(N=1633) |      | Survivors<br>(N=4385) |      | Siblings<br>(N=1493) |      | Survivors<br>(N=2728) |      | Siblings<br>(N=1130) |      | Survivors<br>(N=1671) |      | Siblings<br>(N=945) |      |
|                      | n                     | %    | n                    | %    | n                     | %    | n                    | %    | n                     | %    | n                    | %    | n                     | %    | n                    | %    | n                     | %    | n                    | %    | n                     | %    | n                   | %    |
| General Health       | 175                   | 8.2  | 15                   | 3.2  | 238                   | 10.7 | 17                   | 4.2  | 341                   | 12.4 | 25                   | 4.4  | 304                   | 13.5 | 34                   | 7.6  | 202                   | 14.6 | 20                   | 5.7  | 151                   | 18.3 | 24                  | 8.5  |
| Mental Health        | 302                   | 16.0 | 45                   | 10.2 | 359                   | 17.6 | 63                   | 10.6 | 428                   | 16.8 | 70                   | 9.1  | 350                   | 16.5 | 75                   | 11.4 | 212                   | 16.0 | 54                   | 10.2 | 135                   | 16.9 | 44                  | 11.4 |
| Functional Health    | 225                   | 10.8 | 10                   | 2.1  | 286                   | 13.1 | 12                   | 2.9  | 390                   | 14.4 | 19                   | 3.3  | 376                   | 16.9 | 19                   | 4.2  | 228                   | 16.5 | 19                   | 5.4  | 156                   | 19.0 | 15                  | 5.3  |
| Activity Limitation  | 179                   | 8.6  | 17                   | 3.6  | 192                   | 8.8  | 13                   | 3.2  | 236                   | 8.6  | 26                   | 4.5  | 262                   | 11.7 | 18                   | 4.0  | 192                   | 13.8 | 19                   | 5.4  | 150                   | 18.1 | 23                  | 8.1  |
| Pain                 | 172                   | 8.4  | n/a                  | n/a  | 162                   | 8.1  | n/a                  | n/a  | 225                   | 8.9  | n/a                  | n/a  | 180                   | 8.6  | n/a                  | n/a  | 105                   | 8.0  | n/a                  | n/a  | 60                    | 7.5  | n/a                 | n/a  |
| Anxiety              | 210                   | 10.4 | n/a                  | n/a  | 209                   | 10.4 | n/a                  | n/a  | 255                   | 10.1 | n/a                  | n/a  | 217                   | 10.3 | n/a                  | n/a  | 137                   | 10.3 | n/a                  | n/a  | 90                    | 11.3 | n/a                 | n/a  |
| Any Domain (4)*      | 598                   | 27.6 | 76                   | 15.4 | 677                   | 30.2 | 86                   | 14.3 | 845                   | 30.4 | 111                  | 14.2 | 741                   | 32.7 | 116                  | 17.5 | 467                   | 33.4 | 84                   | 15.6 | 319                   | 38.3 | 73                  | 18.8 |
| Any Domain (6)†      | 744                   | 34.3 | n/a                  | n/a  | 787                   | 35.1 | n/a                  | n/a  | 999                   | 35.9 | n/a                  | n/a  | 851                   | 37.5 | n/a                  | n/a  | 526                   | 37.7 | n/a                  | n/a  | 358                   | 43.0 | n/a                 | n/a  |
| Health Status Score‡ |                       |      |                      |      |                       |      |                      |      |                       |      |                      |      |                       |      |                      |      |                       |      |                      |      |                       |      |                     |      |
| None                 | 1570                  | 72.4 | 417                  | 84.6 | 1567                  | 69.8 | 517                  | 85.7 | 1935                  | 69.6 | 670                  | 85.8 | 1528                  | 67.3 | 546                  | 82.5 | 930                   | 66.6 | 456                  | 84.4 | 514                   | 61.7 | 316                 | 81.2 |
| One domain           | 402                   | 18.5 | 65                   | 13.2 | 417                   | 18.6 | 72                   | 11.9 | 496                   | 17.8 | 91                   | 11.7 | 403                   | 17.8 | 97                   | 14.7 | 240                   | 17.2 | 65                   | 12.0 | 161                   | 19.3 | 50                  | 12.9 |
| Two domains          | 127                   | 5.9  | 11                   | 2.2  | 150                   | 6.7  | 10                   | 1.7  | 194                   | 7.0  | 12                   | 1.5  | 176                   | 7.8  | 12                   | 1.8  | 119                   | 8.5  | 12                   | 2.2  | 76                    | 9.1  | 15                  | 3.9  |
| Three domains        | 51                    | 2.4  | 0                    | 0.0  | 82                    | 3.7  | 3                    | 0.5  | 109                   | 3.9  | 7                    | 0.9  | 111                   | 4.9  | 3                    | 0.5  | 76                    | 5.4  | 5                    | 0.9  | 49                    | 5.9  | 6                   | 1.5  |
| Four domains         | 18                    | 0.8  | 0                    | 0.0  | 28                    | 1.2  | 1                    | 0.2  | 46                    | 1.7  | 1                    | 0.1  | 51                    | 2.2  | 4                    | 0.6  | 32                    | 2.3  | 2                    | 0.4  | 33                    | 4.0  | 2                   | 0.5  |

\* Any domain (4) includes general, mental, functional and activity limitation

† Any domain (6) includes all domains

‡ Health status score includes general, mental, functional and activity limitation

n/a = Not applicable

**Table 4. Percentage of survivors and siblings who reported moderate to extreme adverse health status by 5-year age groups (Female)**

| Characteristic       | Age 18-24             |      |                      |      | Age 25-29             |      |                      |      | Age 30-34             |      |                      |      | Age 35-39             |      |                      |      | Age 40-44             |      |                      |      | Age 45+               |      |                     |      |
|----------------------|-----------------------|------|----------------------|------|-----------------------|------|----------------------|------|-----------------------|------|----------------------|------|-----------------------|------|----------------------|------|-----------------------|------|----------------------|------|-----------------------|------|---------------------|------|
|                      | Survivors<br>(N=4105) |      | Siblings<br>(N=1008) |      | Survivors<br>(N=4231) |      | Siblings<br>(N=1295) |      | Survivors<br>(N=5448) |      | Siblings<br>(N=1633) |      | Survivors<br>(N=4385) |      | Siblings<br>(N=1493) |      | Survivors<br>(N=2728) |      | Siblings<br>(N=1130) |      | Survivors<br>(N=1671) |      | Siblings<br>(N=945) |      |
|                      | n                     | %    | n                    | %    | n                     | %    | n                    | %    | n                     | %    | n                    | %    | n                     | %    | n                    | %    | n                     | %    | n                    | %    | n                     | %    | n                   | %    |
| General Health       | 209                   | 10.9 | 31                   | 6.4  | 273                   | 13.8 | 20                   | 4.2  | 359                   | 13.6 | 35                   | 6.1  | 311                   | 14.9 | 38                   | 6.6  | 222                   | 17.0 | 29                   | 7.4  | 154                   | 18.8 | 32                  | 8.2  |
| Mental Health        | 329                   | 18.9 | 72                   | 14.9 | 357                   | 19.3 | 83                   | 12.1 | 460                   | 18.6 | 90                   | 10.7 | 380                   | 18.8 | 78                   | 9.5  | 223                   | 17.7 | 57                   | 9.8  | 144                   | 17.7 | 58                  | 10.5 |
| Functional Health    | 269                   | 14.4 | 14                   | 2.9  | 331                   | 17.1 | 16                   | 3.3  | 505                   | 19.5 | 24                   | 4.2  | 431                   | 20.9 | 27                   | 4.7  | 304                   | 23.3 | 16                   | 4.1  | 183                   | 22.3 | 26                  | 6.6  |
| Activity Limitation  | 241                   | 12.9 | 29                   | 5.9  | 288                   | 14.9 | 33                   | 6.9  | 407                   | 15.6 | 35                   | 6.1  | 390                   | 18.7 | 45                   | 7.8  | 294                   | 22.4 | 38                   | 9.7  | 252                   | 30.4 | 47                  | 12.0 |
| Pain                 | 164                   | 8.9  | n/a                  | n/a  | 195                   | 10.7 | n/a                  | n/a  | 252                   | 10.4 | n/a                  | n/a  | 183                   | 9.2  | n/a                  | n/a  | 131                   | 10.5 | n/a                  | n/a  | 80                    | 9.9  | n/a                 | n/a  |
| Anxiety              | 272                   | 14.9 | n/a                  | n/a  | 275                   | 15.2 | n/a                  | n/a  | 387                   | 15.8 | n/a                  | n/a  | 306                   | 15.2 | n/a                  | n/a  | 212                   | 16.9 | n/a                  | n/a  | 124                   | 15.3 | n/a                 | n/a  |
| Any Domain (4)*      | 669                   | 34.6 | 117                  | 22.7 | 724                   | 36.5 | 124                  | 18.0 | 1000                  | 37.7 | 140                  | 16.6 | 830                   | 39.4 | 141                  | 17.0 | 543                   | 41.1 | 98                   | 16.8 | 377                   | 45.4 | 111                 | 20.0 |
| Any Domain (6)†      | 812                   | 41.9 | n/a                  | n/a  | 852                   | 43.0 | n/a                  | n/a  | 1193                  | 45.0 | n/a                  | n/a  | 971                   | 46.1 | n/a                  | n/a  | 631                   | 47.7 | n/a                  | n/a  | 424                   | 51.1 | n/a                 | n/a  |
| Health Status Score‡ |                       |      |                      |      |                       |      |                      |      |                       |      |                      |      |                       |      |                      |      |                       |      |                      |      |                       |      |                     |      |
| None                 | 1267                  | 65.4 | 398                  | 77.3 | 1258                  | 63.5 | 565                  | 82.0 | 1653                  | 62.3 | 703                  | 83.4 | 1278                  | 60.6 | 687                  | 83.0 | 779                   | 58.9 | 486                  | 83.2 | 453                   | 54.6 | 443                 | 80.0 |
| One domain           | 406                   | 21.0 | 94                   | 18.3 | 381                   | 19.2 | 103                  | 14.9 | 551                   | 20.8 | 111                  | 13.2 | 414                   | 19.6 | 110                  | 13.3 | 251                   | 19.0 | 70                   | 12.0 | 175                   | 21.1 | 79                  | 14.3 |
| Two domains          | 170                   | 8.8  | 18                   | 3.5  | 204                   | 10.3 | 16                   | 2.3  | 234                   | 8.8  | 16                   | 1.9  | 232                   | 11.0 | 20                   | 2.4  | 142                   | 10.7 | 15                   | 2.6  | 91                    | 11.0 | 17                  | 3.1  |
| Three domains        | 70                    | 3.6  | 4                    | 0.8  | 96                    | 4.8  | 3                    | 0.4  | 148                   | 5.6  | 11                   | 1.3  | 102                   | 4.8  | 6                    | 0.7  | 92                    | 7.0  | 12                   | 2.1  | 68                    | 8.2  | 10                  | 1.8  |
| Four domains         | 23                    | 1.2  | 1                    | 0.2  | 43                    | 2.2  | 2                    | 0.3  | 67                    | 2.5  | 2                    | 0.2  | 82                    | 3.9  | 5                    | 0.6  | 58                    | 4.4  | 1                    | 0.2  | 43                    | 5.2  | 5                   | 0.9  |

\* Any domain (4) includes general, mental, functional and activity limitation

† Any domain (6) includes all domains

‡ Health status score includes general, mental, functional and activity limitation

n/a = Not applicable

**Table 5. Frequency and percentage for adverse health outcomes by chronic condition status**

| Variables                               | Total      | Poor<br>General<br>Health | Poor<br>Mental<br>Health | Functional<br>Impairments | Activity<br>Limitations | Cancer<br>Related<br>Pain | Cancer<br>Related<br>Anxiety | Any<br>Adverse<br>Health<br>Status<br>Domain |
|-----------------------------------------|------------|---------------------------|--------------------------|---------------------------|-------------------------|---------------------------|------------------------------|----------------------------------------------|
|                                         | (N=22,568) | (N=2,939)                 | (N=3,679)                | (N=3,684)                 | (N=3,083)               | (N=1,909)                 | (N=2,694)                    | (N=9,148)                                    |
|                                         | N          | %                         | %                        | %                         | %                       | %                         | %                            | %                                            |
| Any chronic condition grade 3-4*        |            |                           |                          |                           |                         |                           |                              |                                              |
| Any                                     | 8,245      | 20.4                      | 22.9                     | 28.4                      | 24.6                    | 14.0                      | 16.6                         | 54.6                                         |
| < grade 3                               | 14,323     | 9.0                       | 14.5                     | 10.0                      | 7.8                     | 6.3                       | 10.7                         | 32.4                                         |
| Number of chronic conditions grade 3-4* |            |                           |                          |                           |                         |                           |                              |                                              |
| One                                     | 5,792      | 16.6                      | 20.1                     | 23.3                      | 19.6                    | 13.1                      | 14.7                         | 49.4                                         |
| Two or more                             | 2,453      | 29.4                      | 29.7                     | 40.5                      | 36.3                    | 16.2                      | 21.0                         | 66.9                                         |
| < grade 3                               | 14,323     | 9.0                       | 14.5                     | 10.0                      | 7.8                     | 6.3                       | 10.7                         | 32.4                                         |
| Second Malignancy                       |            |                           |                          |                           |                         |                           |                              |                                              |
| Grade 3-4*                              | 1,137      | 23.6                      | 21.6                     | 27.0                      | 25.6                    | 11.8                      | 22.0                         | 55.6                                         |
| < grade 3                               | 21,431     | 12.6                      | 17.4                     | 16.2                      | 13.3                    | 9.0                       | 12.4                         | 39.7                                         |
| Vision/Hearing/Speech                   |            |                           |                          |                           |                         |                           |                              |                                              |
| Grade 3-4*                              | 1,887      | 23.0                      | 25.5                     | 36.9                      | 22.8                    | 12.9                      | 15.5                         | 57.2                                         |
| < grade 3                               | 20,681     | 12.3                      | 16.9                     | 14.9                      | 13.1                    | 8.8                       | 12.6                         | 39.0                                         |
| Endocrine                               |            |                           |                          |                           |                         |                           |                              |                                              |
| Grade 3-4*                              | 2,125      | 19.6                      | 23.7                     | 21.7                      | 19.6                    | 11.2                      | 18.1                         | 50.5                                         |
| < grade 3                               | 20,443     | 12.5                      | 17.0                     | 16.2                      | 13.3                    | 8.9                       | 12.3                         | 39.5                                         |
| Respiratory                             |            |                           |                          |                           |                         |                           |                              |                                              |
| Grade 3-4*                              | 246        | 45.3                      | 42.4                     | 45.8                      | 49.0                    | 24.0                      | 30.1                         | 74.4                                         |
| < grade 3                               | 22,322     | 12.8                      | 17.3                     | 16.4                      | 13.6                    | 9.0                       | 12.7                         | 40.2                                         |
| Cardiac                                 |            |                           |                          |                           |                         |                           |                              |                                              |
| Grade 3-4*                              | 1,382      | 34.7                      | 30.0                     | 40.8                      | 40.0                    | 15.9                      | 19.0                         | 68.3                                         |
| < grade 3                               | 21,186     | 11.8                      | 16.8                     | 15.2                      | 12.2                    | 8.7                       | 12.5                         | 38.7                                         |
| Gastrointestinal                        |            |                           |                          |                           |                         |                           |                              |                                              |
| Grade 3-4*                              | 749        | 19.0                      | 22.0                     | 20.8                      | 19.2                    | 11.3                      | 18.9                         | 47.5                                         |
| < grade 3                               | 21,819     | 13.0                      | 17.5                     | 16.6                      | 13.8                    | 9.1                       | 12.7                         | 40.3                                         |
| Renal                                   |            |                           |                          |                           |                         |                           |                              |                                              |
| Grade 3-4*                              | 176        | 28.2                      | 30.1                     | 36.8                      | 31.0                    | 13.9                      | 16.4                         | 61.9                                         |
| < grade 3                               | 22,392     | 13.0                      | 17.5                     | 16.6                      | 13.8                    | 9.1                       | 12.8                         | 40.4                                         |
| Musculoskeletal                         |            |                           |                          |                           |                         |                           |                              |                                              |
| Grade 3-4*                              | 1,732      | 15.3                      | 18.5                     | 25.8                      | 31.8                    | 21.1                      | 14.5                         | 56.9                                         |
| < grade 3                               | 20,836     | 13.0                      | 17.5                     | 16.0                      | 12.4                    | 8.1                       | 12.7                         | 39.2                                         |
| Neurological                            |            |                           |                          |                           |                         |                           |                              |                                              |
| Grade 3-4*                              | 1,275      | 31.2                      | 34.8                     | 55.2                      | 43.1                    | 20.1                      | 20.7                         | 74.8                                         |
| < grade 3                               | 21,293     | 12.1                      | 16.6                     | 14.4                      | 12.2                    | 8.5                       | 12.4                         | 38.5                                         |
| Other Hematologic†                      |            |                           |                          |                           |                         |                           |                              |                                              |
| Grade 3-4*                              | 816        | 26.8                      | 28.1                     | 35.7                      | 31.2                    | 16.0                      | 18.2                         | 61.3                                         |
| < grade 3                               | 21,752     | 12.7                      | 17.2                     | 16.0                      | 13.3                    | 8.9                       | 12.7                         | 39.8                                         |

\* Chronic conditions according to the Common Terminology Criteria for Adverse Events Version 4.0

† Includes blood clots and aplastic anemia

**Table 6. Percentages for adverse health status outcomes by host and treatment related factors among survivors**

|                                  | Total<br>(N=22,568) | Poor<br>General<br>Health<br>(N=2,939) | Adverse<br>Mental<br>Health<br>(N=3679) | Functional<br>Impairments<br>(3,684) | Activity<br>Limitations<br>(N=3,083) | Cancer<br>Related<br>Pain<br>(N=1,909) | Cancer<br>Related<br>Anxiety<br>(N=2,694) | Adverse<br>Outcome<br>in Any<br>Domain<br>(N=9,148) |
|----------------------------------|---------------------|----------------------------------------|-----------------------------------------|--------------------------------------|--------------------------------------|----------------------------------------|-------------------------------------------|-----------------------------------------------------|
| Variables                        | N                   | %                                      | %                                       | %                                    | %                                    | %                                      | %                                         | %                                                   |
| <b>Sex</b>                       |                     |                                        |                                         |                                      |                                      |                                        |                                           |                                                     |
| Male                             | 11,720              | 12.2                                   | 16.6                                    | 14.6                                 | 10.6                                 | 8.4                                    | 10.4                                      | 36.4                                                |
| Female                           | 10,848              | 14.2                                   | 18.6                                    | 19.1                                 | 17.6                                 | 9.9                                    | 15.5                                      | 45.0                                                |
| <b>Race/ethnicity</b>            |                     |                                        |                                         |                                      |                                      |                                        |                                           |                                                     |
| White                            | 20,033              | 12.6                                   | 17.4                                    | 16.3                                 | 13.8                                 | 8.9                                    | 12.9                                      | 40.0                                                |
| Non-white                        | 2,535               | 18.0                                   | 19.1                                    | 20.4                                 | 15.2                                 | 10.7                                   | 12.8                                      | 44.5                                                |
| <b>Age at interview</b>          |                     |                                        |                                         |                                      |                                      |                                        |                                           |                                                     |
| 18-24 years                      | 4,105               | 9.5                                    | 17.4                                    | 12.5                                 | 10.6                                 | 8.7                                    | 12.5                                      | 37.9                                                |
| 25-29 years                      | 4,231               | 12.2                                   | 18.4                                    | 15.0                                 | 11.6                                 | 9.3                                    | 12.7                                      | 38.7                                                |
| 30-34 years                      | 5,448               | 13.0                                   | 17.7                                    | 16.9                                 | 12.0                                 | 9.6                                    | 12.9                                      | 40.2                                                |
| 35-39 years                      | 4,385               | 14.2                                   | 17.6                                    | 18.8                                 | 15.0                                 | 8.9                                    | 12.7                                      | 41.6                                                |
| 40-44 years                      | 2,728               | 15.8                                   | 16.8                                    | 19.8                                 | 18.0                                 | 9.2                                    | 13.5                                      | 42.4                                                |
| 45+ years                        | 1,671               | 18.5                                   | 17.3                                    | 20.7                                 | 24.2                                 | 8.7                                    | 13.3                                      | 46.8                                                |
| <b>Age at diagnosis</b>          |                     |                                        |                                         |                                      |                                      |                                        |                                           |                                                     |
| 0-4 years                        | 5,729               | 11.5                                   | 16.7                                    | 16.4                                 | 12.0                                 | 7.8                                    | 12.0                                      | 37.6                                                |
| 5-9 years                        | 5,543               | 12.9                                   | 17.9                                    | 16.4                                 | 11.8                                 | 8.1                                    | 12.5                                      | 39.3                                                |
| 10-14 years                      | 6,135               | 13.7                                   | 18.5                                    | 16.9                                 | 14.6                                 | 10.0                                   | 13.7                                      | 42.3                                                |
| 15-20 years                      | 5,161               | 14.7                                   | 17.3                                    | 17.4                                 | 17.5                                 | 10.6                                   | 13.3                                      | 43.0                                                |
| <b>Income &lt; \$20,000/year</b> |                     |                                        |                                         |                                      |                                      |                                        |                                           |                                                     |
| Yes                              | 3,207               | 25.0                                   | 30.6                                    | 32.6                                 | 24.1                                 | 8.7                                    | 18.3                                      | 58.3                                                |
| No                               | 16,868              | 10.2                                   | 15.3                                    | 12.7                                 | 11.4                                 | 16.3                                   | 12.1                                      | 36.6                                                |

|                                                | Total<br>(N=22,568) | Poor<br>General<br>Health<br>(N=2,939) | Adverse<br>Mental<br>Health<br>(N=3679) | Functional<br>Impairments<br>(3,684) | Activity<br>Limitations<br>(N=3,083) | Cancer<br>Related<br>Pain<br>(N=1,909) | Cancer<br>Related<br>Anxiety<br>(N=2,694) | Adverse<br>Outcome<br>in Any<br>Domain<br>(N=9,148) |
|------------------------------------------------|---------------------|----------------------------------------|-----------------------------------------|--------------------------------------|--------------------------------------|----------------------------------------|-------------------------------------------|-----------------------------------------------------|
| Variables                                      | N                   | %                                      | %                                       | %                                    | %                                    | %                                      | %                                         | %                                                   |
| <b>High School graduate</b>                    |                     |                                        |                                         |                                      |                                      |                                        |                                           |                                                     |
| Yes                                            | 19,735              | 11.9                                   | 16.8                                    | 15.1                                 | 12.8                                 | 8.7                                    | 12.5                                      | 38.7                                                |
| No                                             | 1,419               | 27.2                                   | 30.4                                    | 35.2                                 | 23.3                                 | 16.3                                   | 16.0                                      | 59.8                                                |
| <b>Body mass index</b>                         |                     |                                        |                                         |                                      |                                      |                                        |                                           |                                                     |
| < 18.5 kg/m <sup>2</sup>                       | 1,055               | 19.1                                   | 21.7                                    | 23.0                                 | 22.2                                 | 13.3                                   | 17.5                                      | 51.8                                                |
| 18.5-24.9 kg/m <sup>2</sup>                    | 10,842              | 10.7                                   | 16.3                                    | 15.3                                 | 12.4                                 | 8.6                                    | 13.1                                      | 38.4                                                |
| 25.0-29.9 kg/m <sup>2</sup>                    | 6,557               | 12.1                                   | 17.3                                    | 15.2                                 | 12.1                                 | 8.7                                    | 11.4                                      | 38.1                                                |
| 30+ kg/m <sup>2</sup>                          | 4,114               | 19.9                                   | 20.6                                    | 21.4                                 | 18.6                                 | 10.2                                   | 13.4                                      | 47.1                                                |
| <b>Smoking status</b>                          |                     |                                        |                                         |                                      |                                      |                                        |                                           |                                                     |
| Never                                          | 15,075              | 10.9                                   | 15.0                                    | 15.9                                 | 13.1                                 | 7.8                                    | 11.8                                      | 38.0                                                |
| Former                                         | 2,363               | 14.5                                   | 20.5                                    | 18.1                                 | 13.7                                 | 12.4                                   | 14.2                                      | 43.3                                                |
| Current                                        | 3,634               | 20.5                                   | 27.6                                    | 19.5                                 | 15.9                                 | 13.3                                   | 15.8                                      | 49.2                                                |
| <b>Meets CDC physical activity guidelines*</b> |                     |                                        |                                         |                                      |                                      |                                        |                                           |                                                     |
| Yes                                            | 15,555              | 9.9                                    | 15.9                                    | 13.7                                 | 10.5                                 | 8.1                                    | 12.2                                      | 37.1                                                |
| No                                             | 6,462               | 20.7                                   | 21.7                                    | 24.0                                 | 22.2                                 | 11.7                                   | 14.5                                      | 49.9                                                |
| <b>Anthracyclines</b>                          |                     |                                        |                                         |                                      |                                      |                                        |                                           |                                                     |
| Yes                                            | 7,633               | 12.7                                   | 18.2                                    | 15.7                                 | 14.7                                 | 10.8                                   | 14.0                                      | 41.2                                                |
| No                                             | 12,457              | 12.9                                   | 17.6                                    | 17.2                                 | 13.3                                 | 7.5                                    | 12.3                                      | 40.0                                                |
| <b>Alkylating agents</b>                       |                     |                                        |                                         |                                      |                                      |                                        |                                           |                                                     |
| Yes                                            | 10,479              | 13.8                                   | 18.7                                    | 16.4                                 | 14.4                                 | 9.7                                    | 14.2                                      | 41.5                                                |
| No                                             | 9,611               | 11.8                                   | 16.9                                    | 16.9                                 | 13.2                                 | 7.7                                    | 11.6                                      | 39.4                                                |

|                            | Total<br>(N=22,568) | Poor<br>General<br>Health<br>(N=2,939) | Adverse<br>Mental<br>Health<br>(N=3679) | Functional<br>Impairments<br>(3,684) | Activity<br>Limitations<br>(N=3,083) | Cancer<br>Related<br>Pain<br>(N=1,909) | Cancer<br>Related<br>Anxiety<br>(N=2,694) | Adverse<br>Outcome<br>in Any<br>Domain<br>(N=9,148) |
|----------------------------|---------------------|----------------------------------------|-----------------------------------------|--------------------------------------|--------------------------------------|----------------------------------------|-------------------------------------------|-----------------------------------------------------|
| Variables                  | N                   | %                                      | %                                       | %                                    | %                                    | %                                      | %                                         | %                                                   |
| <b>Cranial radiation</b>   |                     |                                        |                                         |                                      |                                      |                                        |                                           |                                                     |
| None                       | 13,570              | 12.3                                   | 17.2                                    | 14.5                                 | 14.2                                 | 9.3                                    | 13.4                                      | 39.3                                                |
| 3.0-23.9 Gray              | 1,862               | 10.1                                   | 18.8                                    | 13.3                                 | 9.5                                  | 6.6                                    | 12.3                                      | 37.0                                                |
| 24.0-29.9 Gray             | 2,603               | 12.9                                   | 18.0                                    | 14.9                                 | 10.5                                 | 8.5                                    | 11.6                                      | 38.7                                                |
| 30.0+ Gray                 | 2,244               | 19.6                                   | 20.1                                    | 35.3                                 | 19.3                                 | 8.4                                    | 12.5                                      | 53.2                                                |
| <b>Chest radiation</b>     |                     |                                        |                                         |                                      |                                      |                                        |                                           |                                                     |
| None                       | 14,520              | 11.9                                   | 17.6                                    | 16.7                                 | 13.2                                 | 9.2                                    | 12.4                                      | 39.6                                                |
| 6.2-23.9 Gray              | 1,507               | 13.6                                   | 17.6                                    | 13.3                                 | 13.1                                 | 8.3                                    | 14.1                                      | 40.5                                                |
| 24.0-37.9 Gray             | 2,306               | 16.9                                   | 18.1                                    | 18.0                                 | 15.4                                 | 7.7                                    | 14.5                                      | 44.0                                                |
| 38.0+ Gray                 | 1,946               | 15.3                                   | 18.7                                    | 17.7                                 | 17.6                                 | 8.2                                    | 15.0                                      | 43.0                                                |
| <b>Abdominal radiation</b> |                     |                                        |                                         |                                      |                                      |                                        |                                           |                                                     |
| None                       | 15,038              | 12.4                                   | 17.7                                    | 16.8                                 | 13.8                                 | 9.2                                    | 12.7                                      | 40.3                                                |
| 1.4-23.9 Gray              | 1,428               | 12.2                                   | 16.9                                    | 13.2                                 | 12.0                                 | 7.0                                    | 12.6                                      | 36.3                                                |
| 24.0-34.9 Gray             | 1,740               | 14.5                                   | 17.7                                    | 16.7                                 | 12.2                                 | 7.1                                    | 12.9                                      | 40.7                                                |
| 35.0+ Gray                 | 2,073               | 16.5                                   | 18.9                                    | 18.6                                 | 17.3                                 | 9.5                                    | 15.6                                      | 44.6                                                |
| <b>Craniotomy</b>          |                     |                                        |                                         |                                      |                                      |                                        |                                           |                                                     |
| Yes                        | 2,286               | 17.1                                   | 19.9                                    | 32.3                                 | 18.7                                 | 7.1                                    | 11.4                                      | 50.3                                                |
| No                         | 20,282              | 12.7                                   | 17.4                                    | 15.0                                 | 13.4                                 | 9.4                                    | 13.0                                      | 39.4                                                |
| <b>Thoracotomy</b>         |                     |                                        |                                         |                                      |                                      |                                        |                                           |                                                     |
| Yes                        | 984                 | 14.7                                   | 17.4                                    | 16.8                                 | 19.3                                 | 12.5                                   | 16.5                                      | 47.3                                                |
| No                         | 21,584              | 13.1                                   | 17.6                                    | 16.8                                 | 13.7                                 | 9.0                                    | 12.7                                      | 40.2                                                |

|                                   | Total<br>(N=22,568) | Poor<br>General<br>Health<br>(N=2,939) | Adverse<br>Mental<br>Health<br>(N=3679) | Functional<br>Impairments<br>(3,684) | Activity<br>Limitations<br>(N=3,083) | Cancer<br>Related<br>Pain<br>(N=1,909) | Cancer<br>Related<br>Anxiety<br>(N=2,694) | Adverse<br>Outcome<br>in Any<br>Domain<br>(N=9,148) |
|-----------------------------------|---------------------|----------------------------------------|-----------------------------------------|--------------------------------------|--------------------------------------|----------------------------------------|-------------------------------------------|-----------------------------------------------------|
| Variables                         | N                   | %                                      | %                                       | %                                    | %                                    | %                                      | %                                         | %                                                   |
| <b>Nephrectomy</b>                |                     |                                        |                                         |                                      |                                      |                                        |                                           |                                                     |
| Yes                               | 1,311               | 10.5                                   | 15.3                                    | 10.9                                 | 10.5                                 | 7.3                                    | 10.7                                      | 34.2                                                |
| No                                | 21,257              | 13.3                                   | 17.8                                    | 17.1                                 | 14.2                                 | 9.2                                    | 13.0                                      | 40.9                                                |
| <b>Cystectomy</b>                 |                     |                                        |                                         |                                      |                                      |                                        |                                           |                                                     |
| Yes                               | 152                 | 24.7                                   | 21.2                                    | 29.1                                 | 29.3                                 | 17.6                                   | 16.3                                      | 46.7                                                |
| No                                | 22,416              | 13.1                                   | 17.6                                    | 16.7                                 | 13.8                                 | 9.1                                    | 12.9                                      | 40.5                                                |
| <b>Lower extremity amputation</b> |                     |                                        |                                         |                                      |                                      |                                        |                                           |                                                     |
| Yes                               | 1,093               | 13.9                                   | 17.9                                    | 24.2                                 | 30.1                                 | 20.0                                   | 14.6                                      | 57.4                                                |
| No                                | 21,475              | 13.1                                   | 17.6                                    | 16.4                                 | 13.1                                 | 8.6                                    | 12.8                                      | 39.7                                                |
| <b>Upper extremity amputation</b> |                     |                                        |                                         |                                      |                                      |                                        |                                           |                                                     |
| Yes                               | 104                 | 11.7                                   | 20.0                                    | 24.2                                 | 18.6                                 | 21.4                                   | 16.2                                      | 46.2                                                |
| No                                | 22,464              | 13.2                                   | 17.6                                    | 16.7                                 | 13.9                                 | 9.1                                    | 12.9                                      | 40.5                                                |

kg/m<sup>2</sup>=kilograms per meters squared

\* The equivalent of at least 150 minutes of moderate physical activity per week.

CDC=Centers for Disease Control and Prevention

**Table 7. Percentage of survivors and siblings with one or more poor health status outcome, by five-year age groups**

| Diagnosis            | One or more Domains*   |             |             |             |             |           | Two or more Domains*  |             |             |             |             |           |
|----------------------|------------------------|-------------|-------------|-------------|-------------|-----------|-----------------------|-------------|-------------|-------------|-------------|-----------|
|                      | 18-24 years            | 25-29 years | 30-34 years | 35-39 years | 40-44 years | 45+ years | 18-24 years           | 25-29 years | 30-34 years | 35-39 years | 40-44 years | 45+ years |
| Siblings             | 19.1                   | 16.2        | 15.4        | 17.2        | 16.1        | 19.5      | 3.4                   | 2.7         | 3.0         | 3.3         | 4.2         | 5.8       |
| Survivors            | 30.9                   | 33.1        | 33.9        | 35.8        | 37.0        | 41.7      | 11.2                  | 14.3        | 14.6        | 17.2        | 19.0        | 21.5      |
| Leukemia             | 28.1                   | 30.8        | 32.3        | 32.0        | 32.8        | 31.8      | 8.9                   | 12.7        | 13.1        | 13.4        | 16.6        | 11.4      |
| CNS malignancy       | 48.0                   | 46.0        | 48.0        | 49.5        | 47.1        | 45.3      | 21.6                  | 24.4        | 24.0        | 29.1        | 31.2        | 25.5      |
| Hodgkin lymphoma     | 26.0                   | 28.8        | 31.7        | 32.5        | 36.3        | 43.8      | 7.3                   | 10.7        | 13.1        | 14.9        | 18.5        | 23.8      |
| Non-Hodgkin lymphoma | 24.3                   | 31.8        | 26.2        | 36.7        | 27.1        | 32.9      | 6.9                   | 13.0        | 9.9         | 17.9        | 12.0        | 14.6      |
| Wilms tumor          | 24.8                   | 28.3        | 25.8        | 32.2        | 19.6        | 18.2      | 8.6                   | 10.8        | 11.1        | 14.9        | 8.9         | 18.2      |
| Neuroblastoma        | 28.8                   | 28.8        | 26.4        | 28.6        | 20.8        | 33.3      | 9.7                   | 11.3        | 10.9        | 14.3        | 8.3         | 0.0       |
| Soft tissue sarcoma  | 30.1                   | 30.9        | 31.1        | 30.7        | 35.0        | 34.6      | 12.3                  | 13.7        | 13.0        | 12.4        | 16.0        | 16.1      |
| Bone malignancy      | 40.4                   | 39.9        | 42.0        | 42.8        | 47.7        | 52.6      | 18.8                  | 16.5        | 19.7        | 22.6        | 23.4        | 29.4      |
| Diagnosis            | Three or more Domains* |             |             |             |             |           | Four or more Domains* |             |             |             |             |           |
|                      | 18-24 years            | 25-29 years | 30-34 years | 35-39 years | 40-44 years | 45+ years | 18-24 years           | 25-29 years | 30-34 years | 35-39 years | 40-44 years | 45+ years |
| Siblings             | 0.5                    | 0.7         | 1.3         | 1.2         | 1.8         | 2.4       | 0.1                   | 0.2         | 0.2         | 0.6         | 0.3         | 0.7       |
| Survivors            | 3.9                    | 5.9         | 6.8         | 7.9         | 9.5         | 11.5      | 1.0                   | 1.7         | 2.1         | 3.0         | 3.3         | 4.5       |
| Leukemia             | 3.5                    | 5.0         | 5.5         | 5.6         | 7.7         | 8.5       | 0.7                   | 1.4         | 1.8         | 2.4         | 3.1         | 3.0       |
| CNS malignancy       | 7.1                    | 10.8        | 12.8        | 14.1        | 16.6        | 11.7      | 1.4                   | 2.6         | 2.8         | 4.8         | 5.8         | 3.6       |
| Hodgkin lymphoma     | 3.1                    | 4.7         | 5.7         | 7.0         | 9.6         | 13.2      | 1.9                   | 1.9         | 2.5         | 2.8         | 3.6         | 6.1       |
| Non-Hodgkin lymphoma | 2.2                    | 4.4         | 4.0         | 7.4         | 5.4         | 6.3       | 0.3                   | 1.4         | 1.3         | 3.3         | 1.3         | 1.9       |
| Wilms tumor          | 2.9                    | 3.9         | 5.4         | 6.7         | 1.8         | 9.1       | 0.4                   | 0.8         | 2.1         | 2.9         | 0.0         | 0.0       |
| Neuroblastoma        | 2.8                    | 5.4         | 4.2         | 6.3         | 8.3         | 0.0       | 1.6                   | 0.9         | 1.3         | 2.7         | 0.0         | 0.0       |
| Soft tissue sarcoma  | 4.7                    | 5.0         | 7.4         | 6.7         | 10.2        | 10.7      | 1.9                   | 1.8         | 1.5         | 2.0         | 4.1         | 4.4       |
| Bone malignancy      | 5.8                    | 8.1         | 8.9         | 10.5        | 9.9         | 13.5      | 1.3                   | 2.7         | 3.1         | 3.9         | 2.7         | 4.2       |

\* Includes poor general health, adverse mental health, functional impairments and activity limitations

CNS=Central Nervous system



Figure 1 Bone Cancer

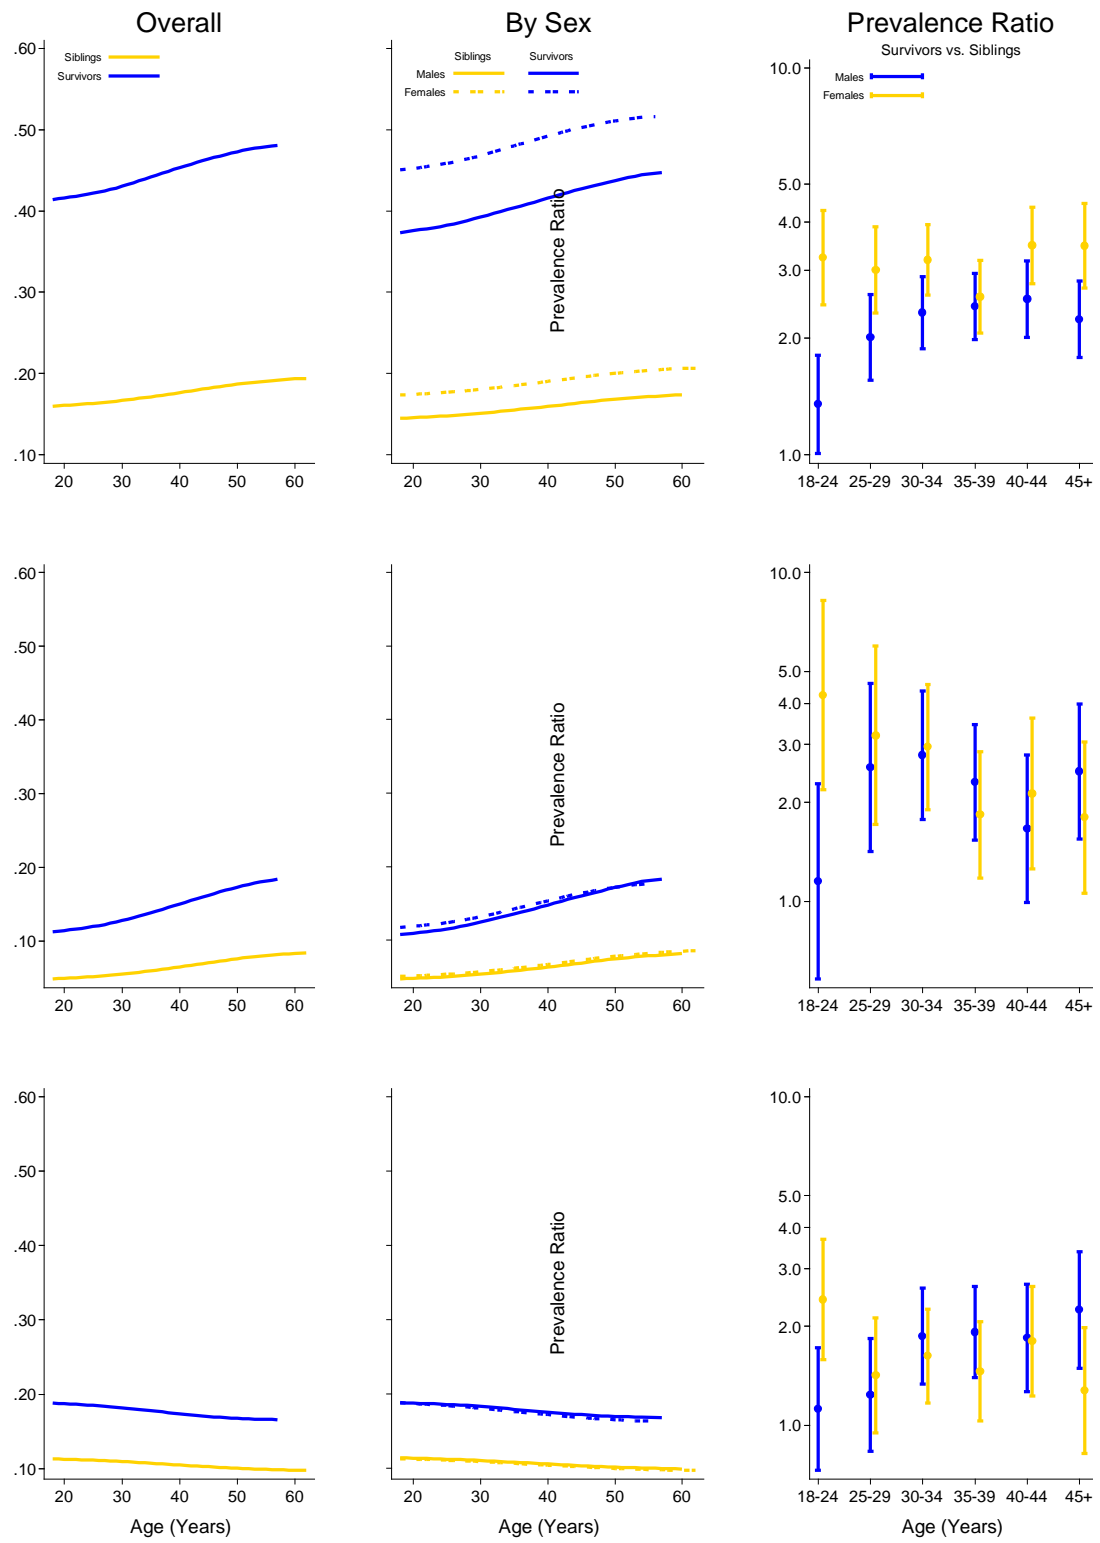

Figure 1 Bone Cancer

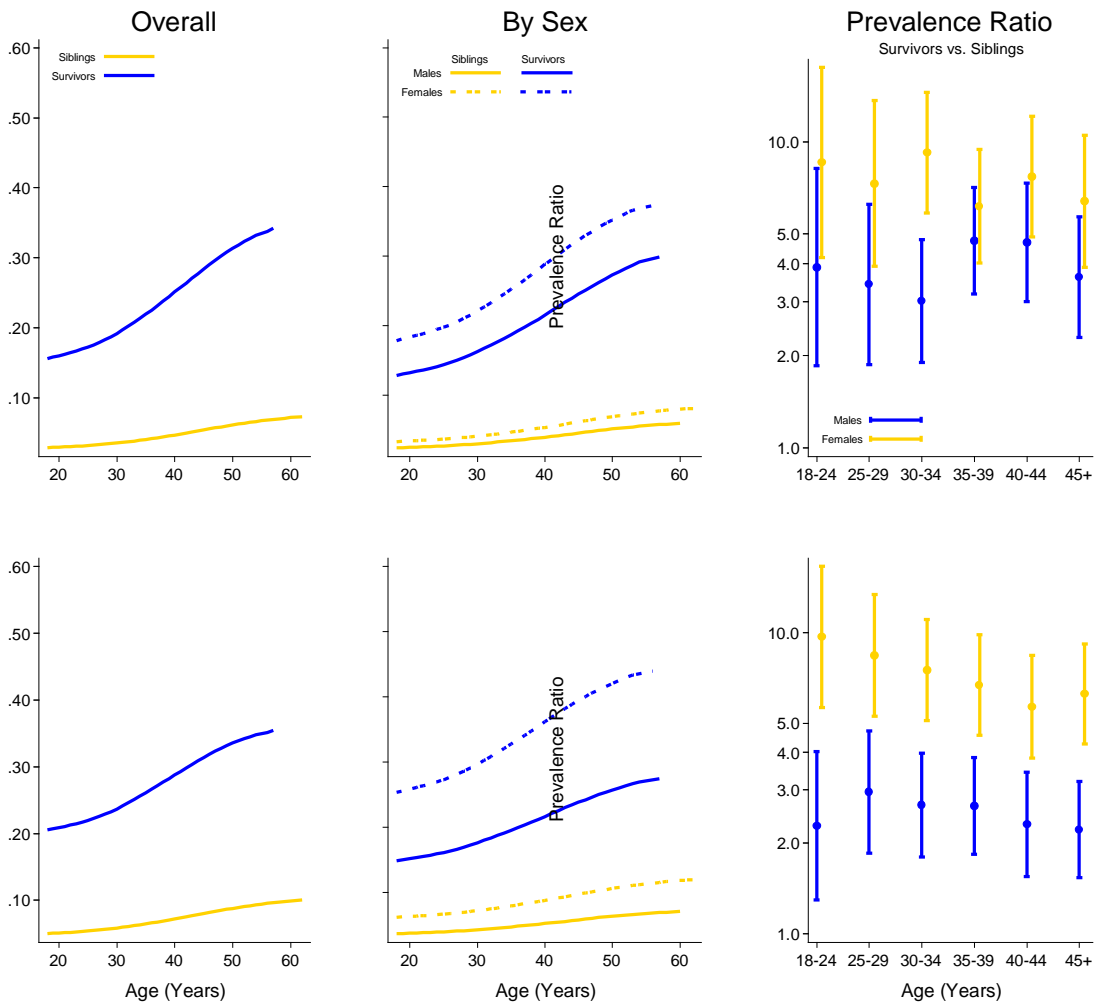

Figure 2 CNS

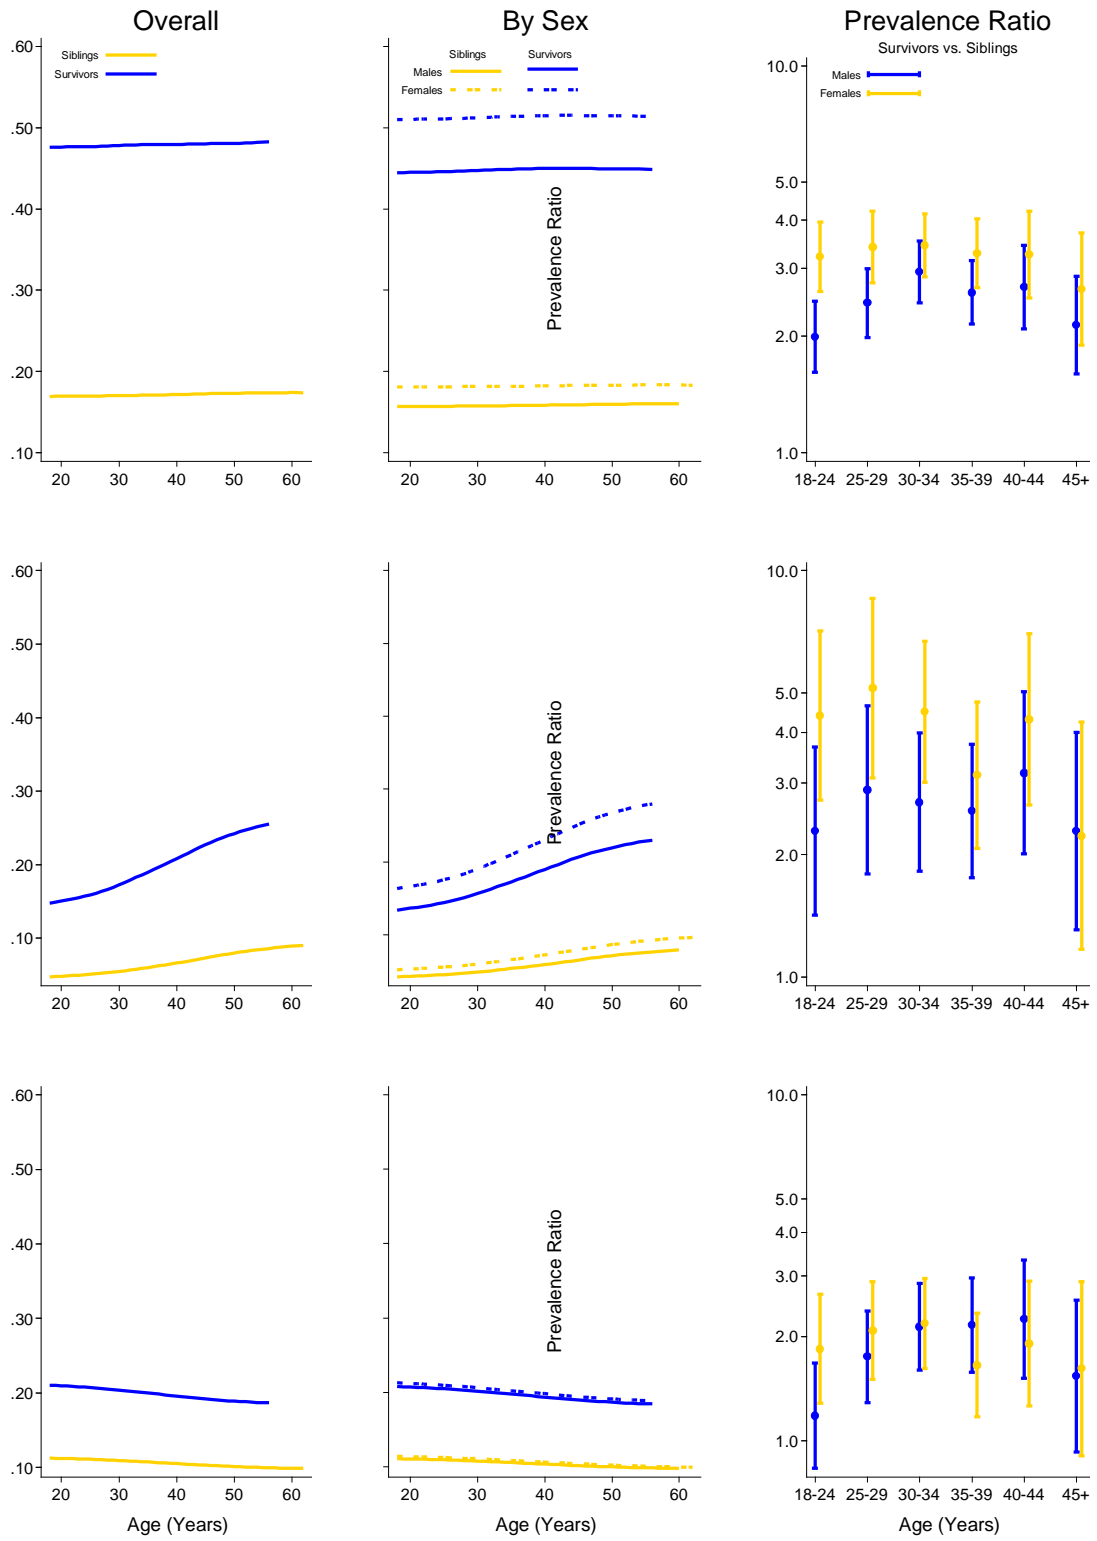

Figure 2 CNS

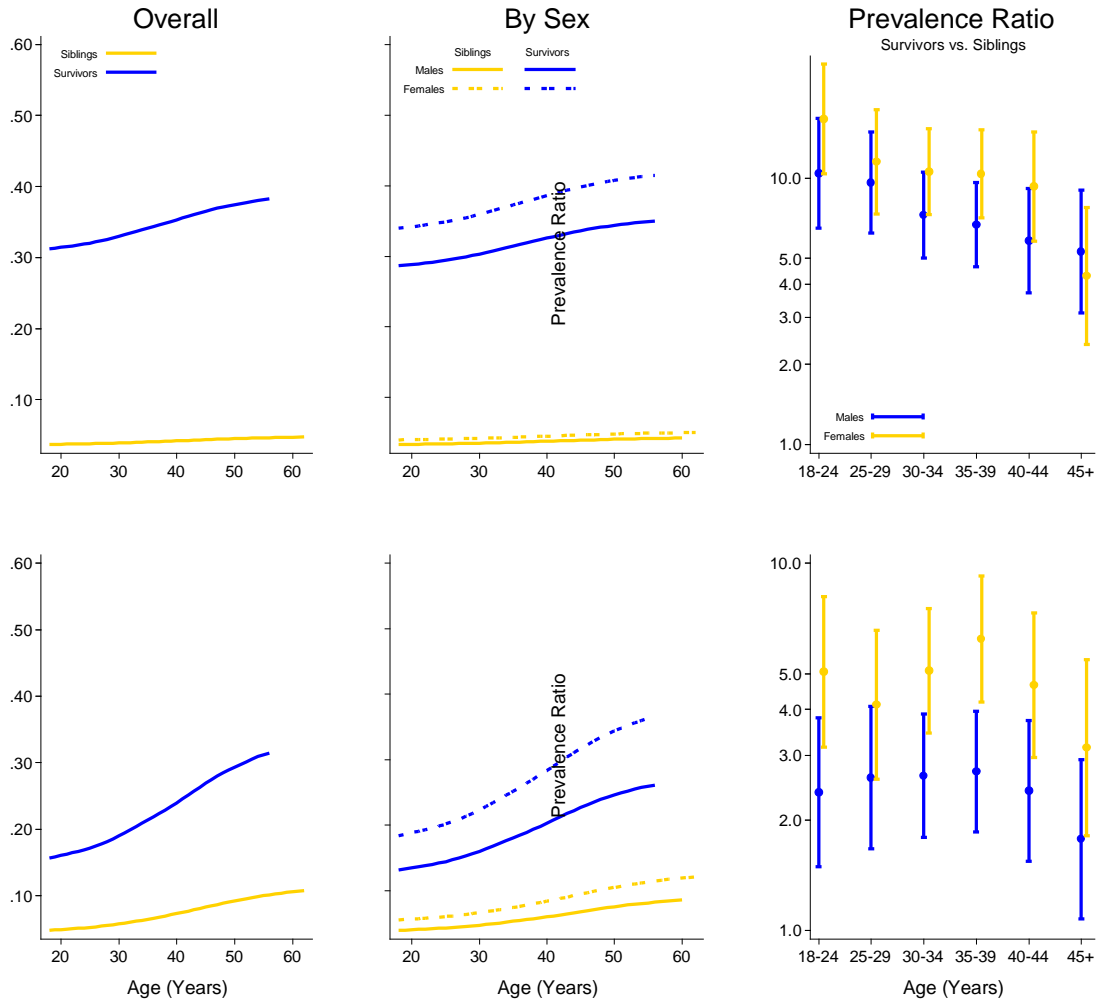

Figure 3 Hodgkin Lymphoma

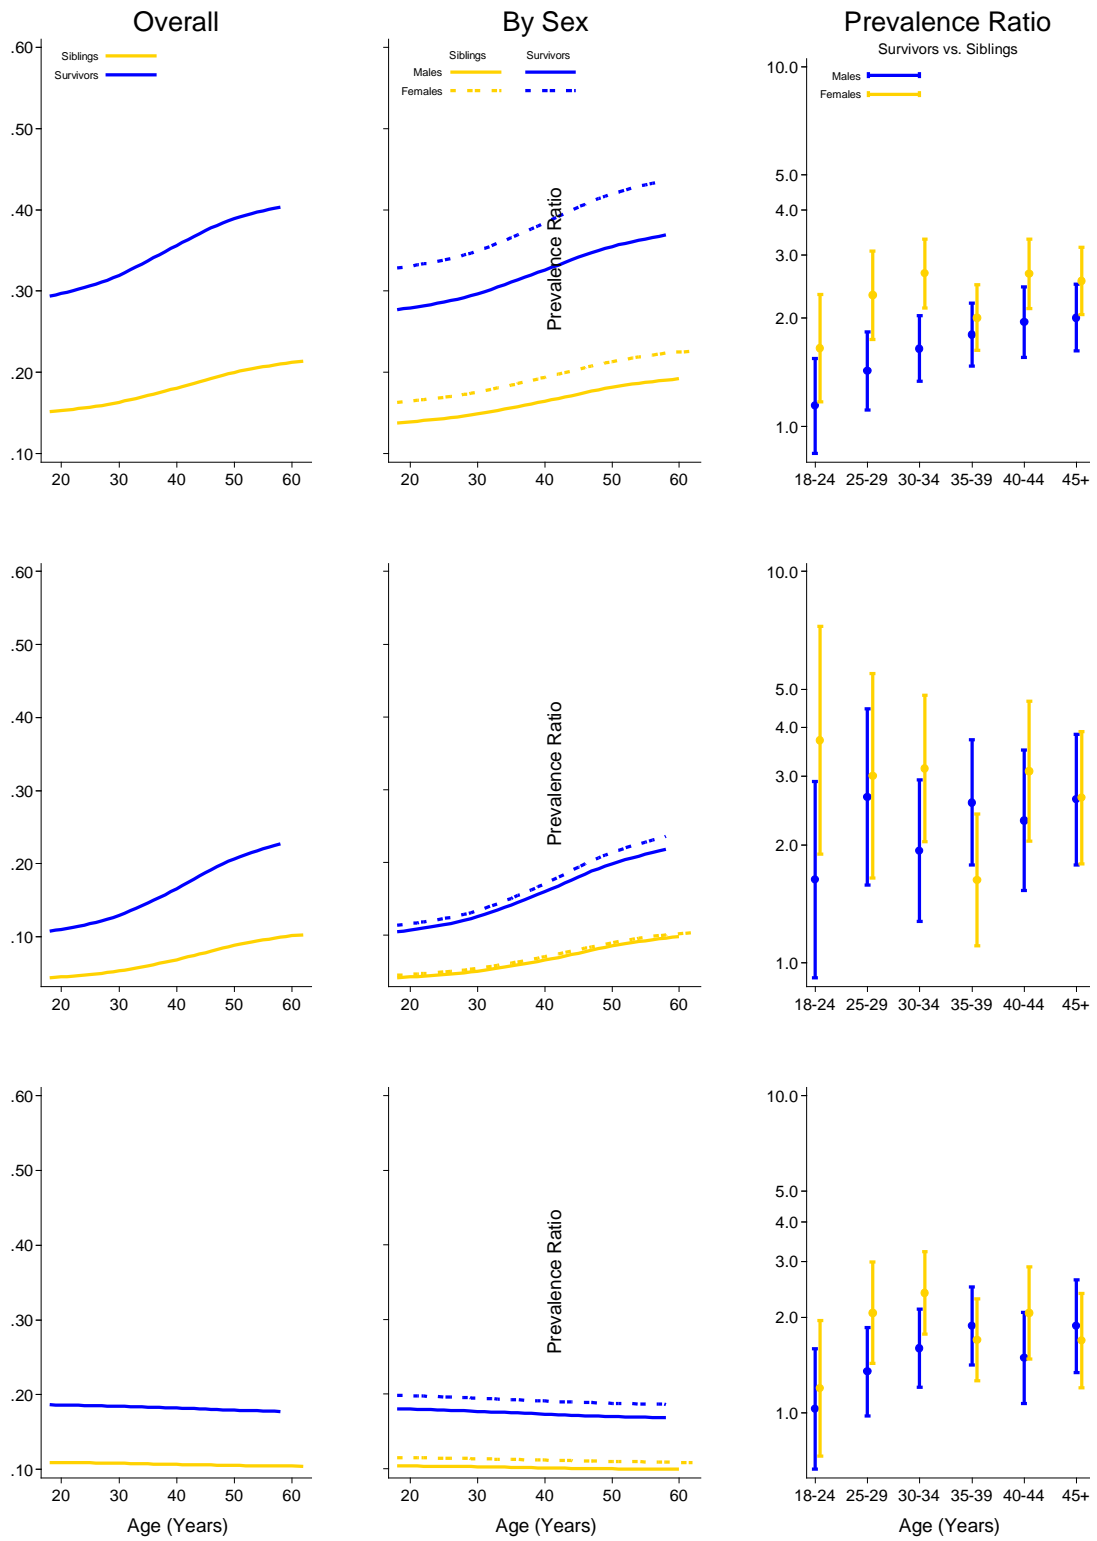

Figure 3 Hodgkin lymphoma

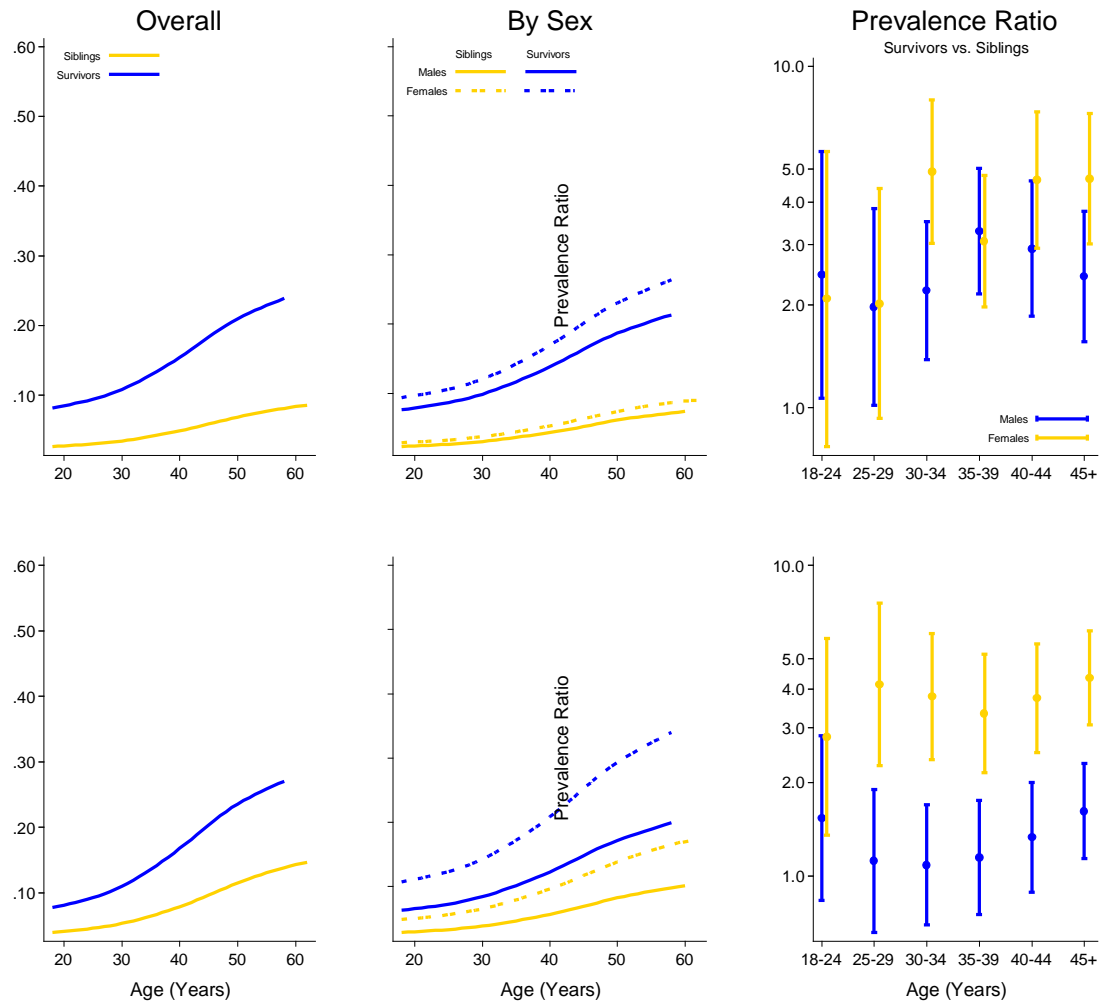

Figure 4 Leukemia

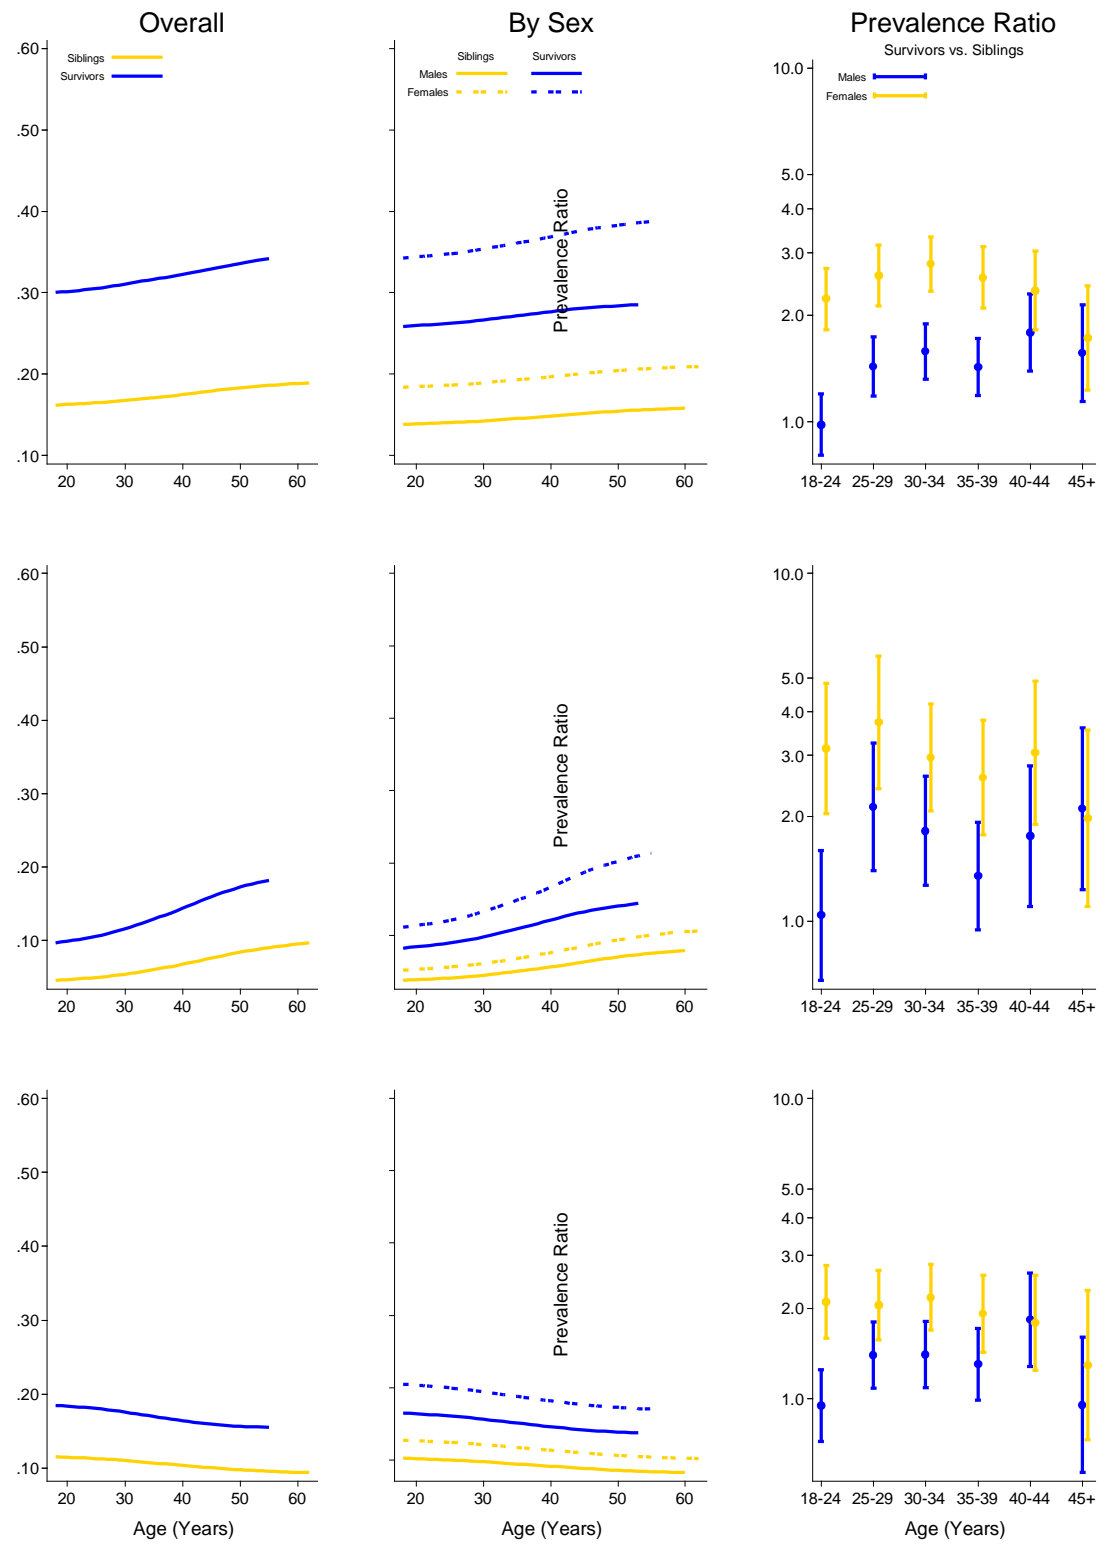

Figure 4 Leukemia

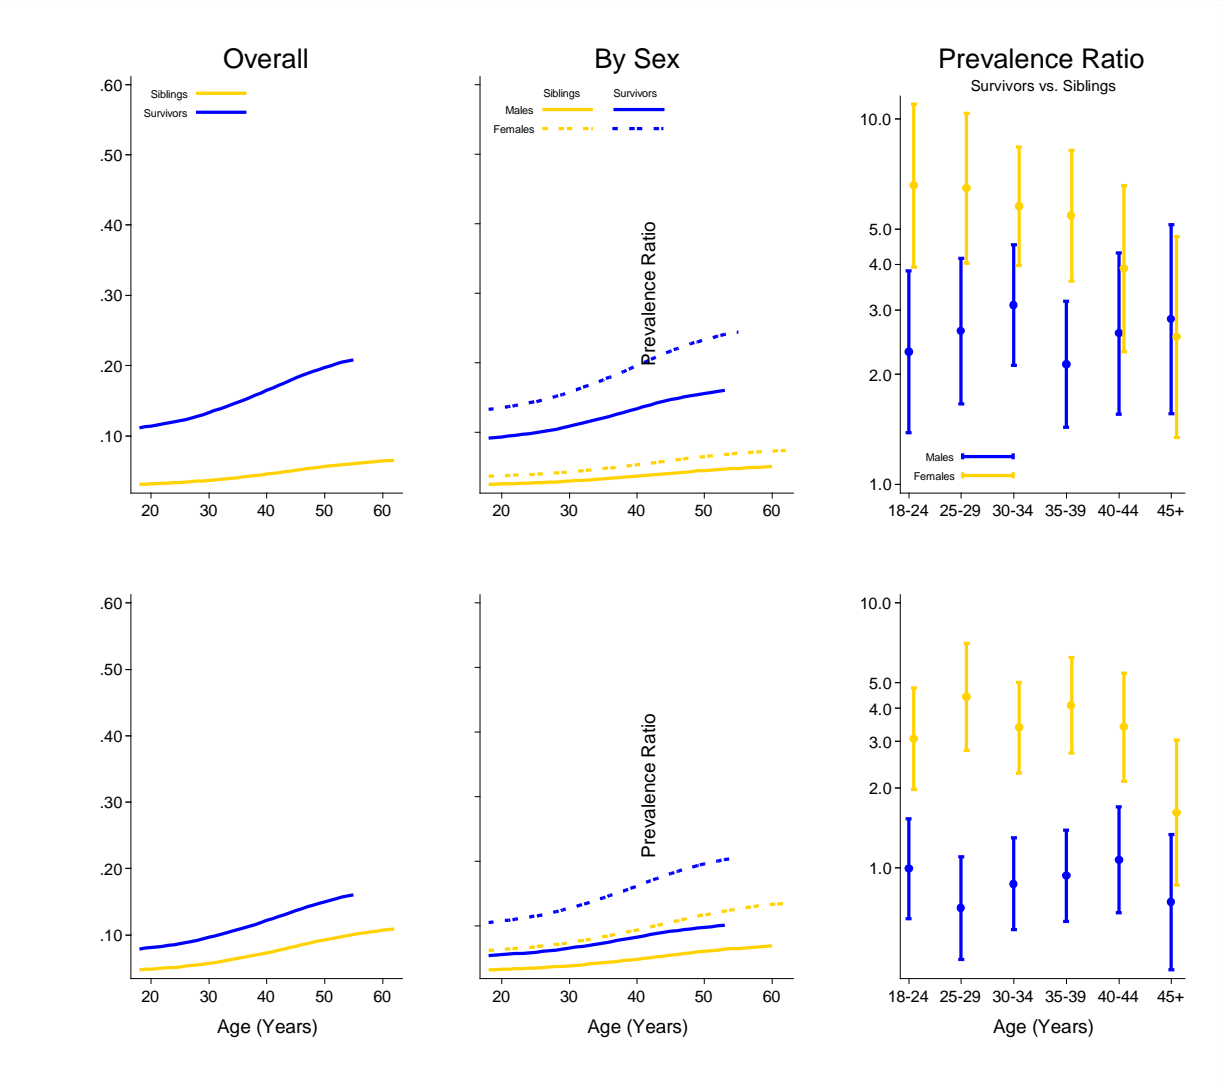



Figure 5 Neuroblastoma

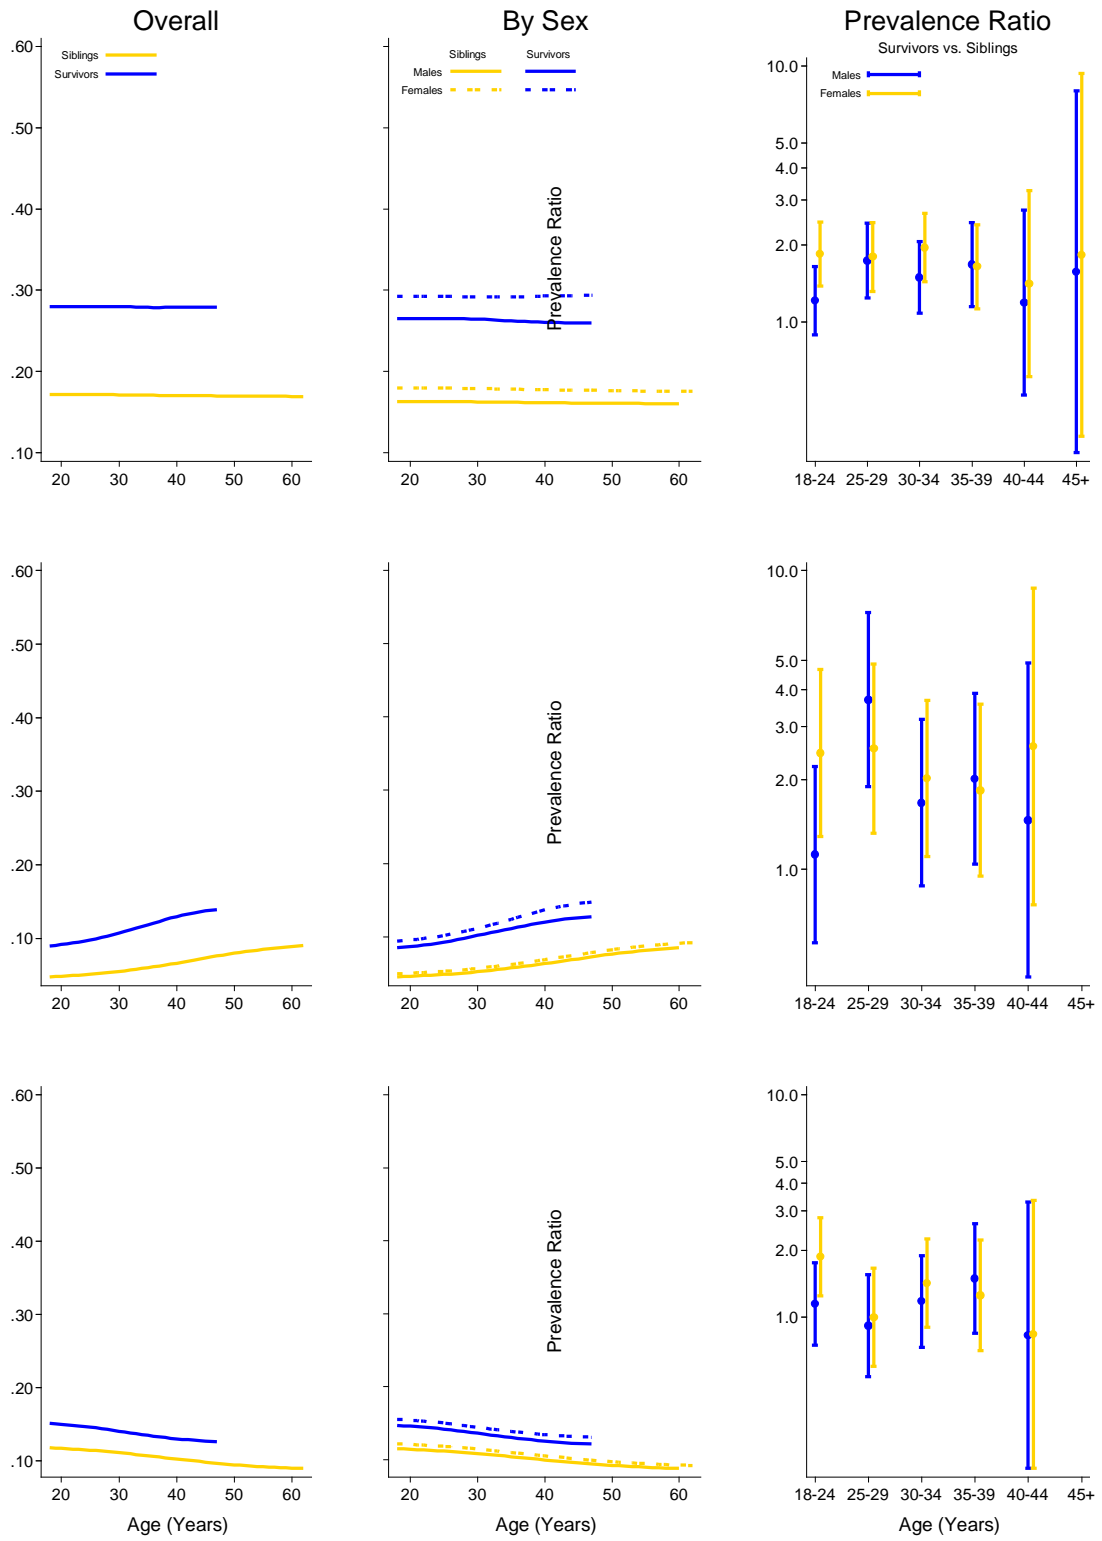

Figure 5 Neuroblastoma

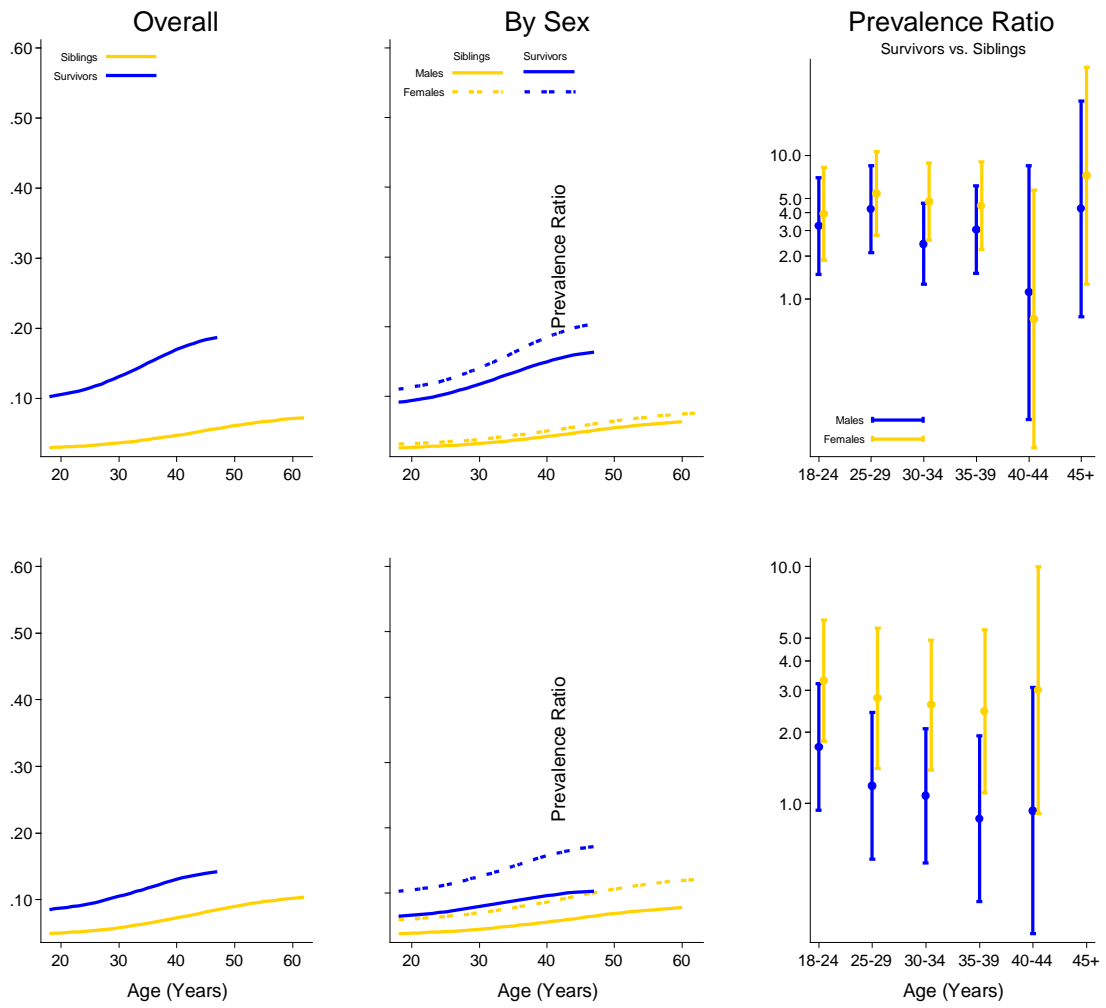

Figure 6 NHL

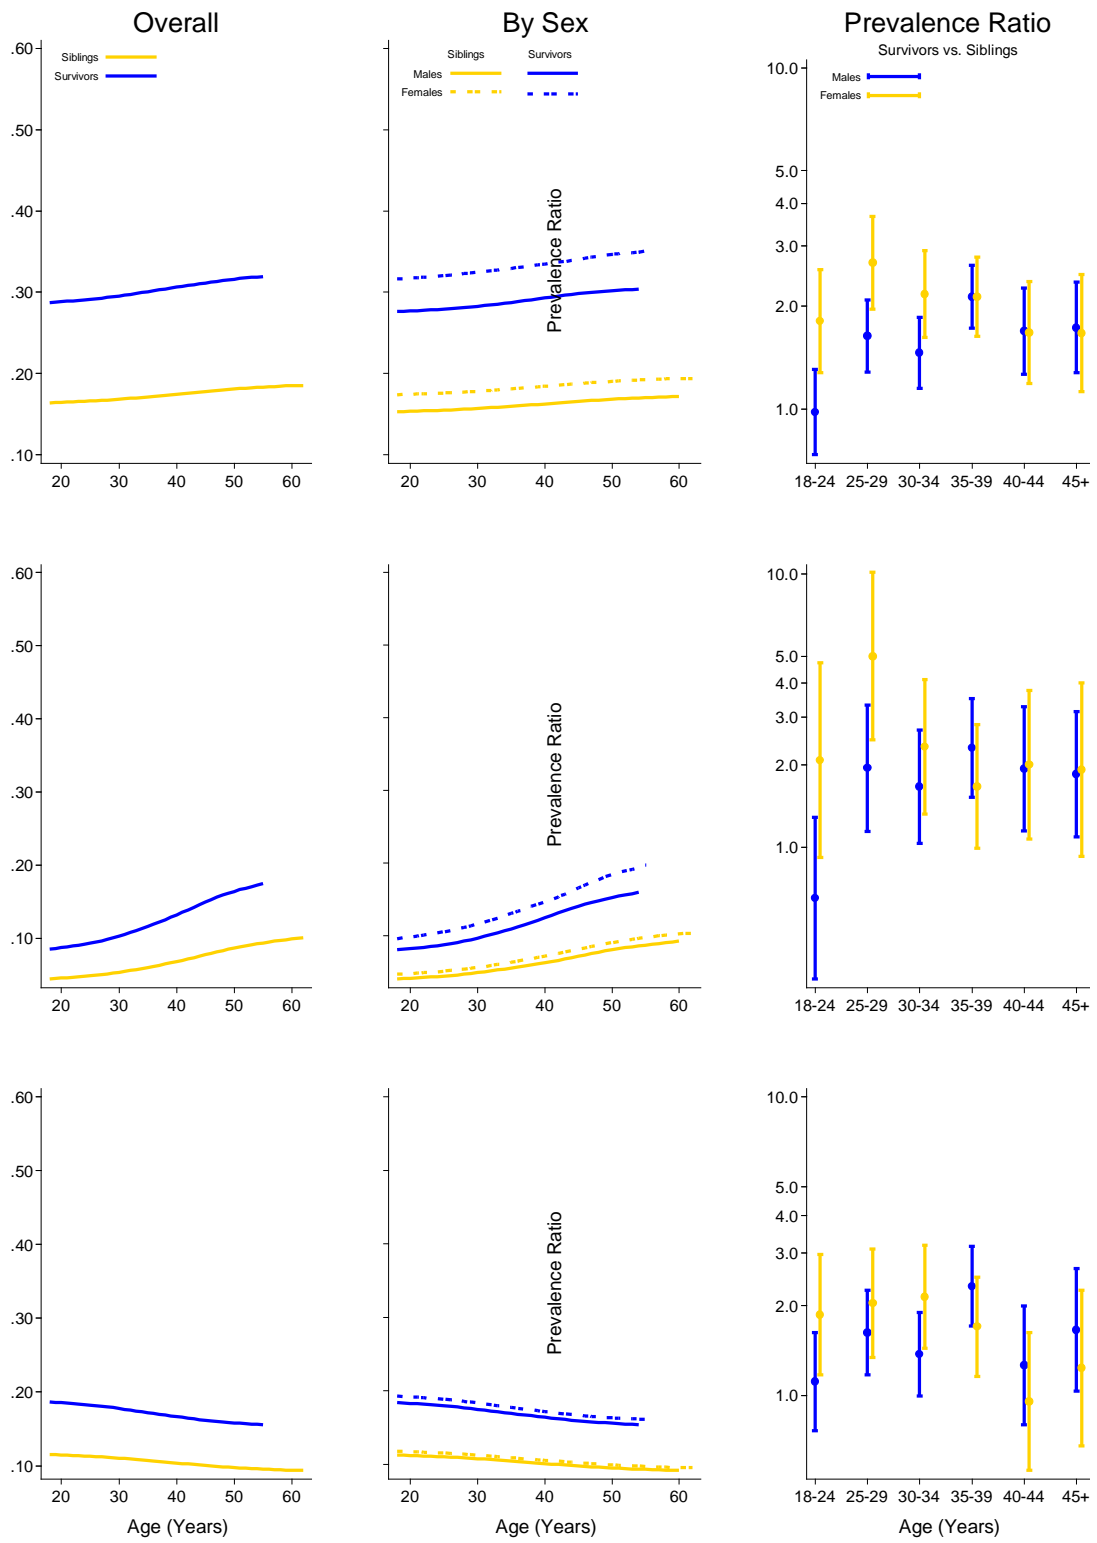

Figure 6 NHL

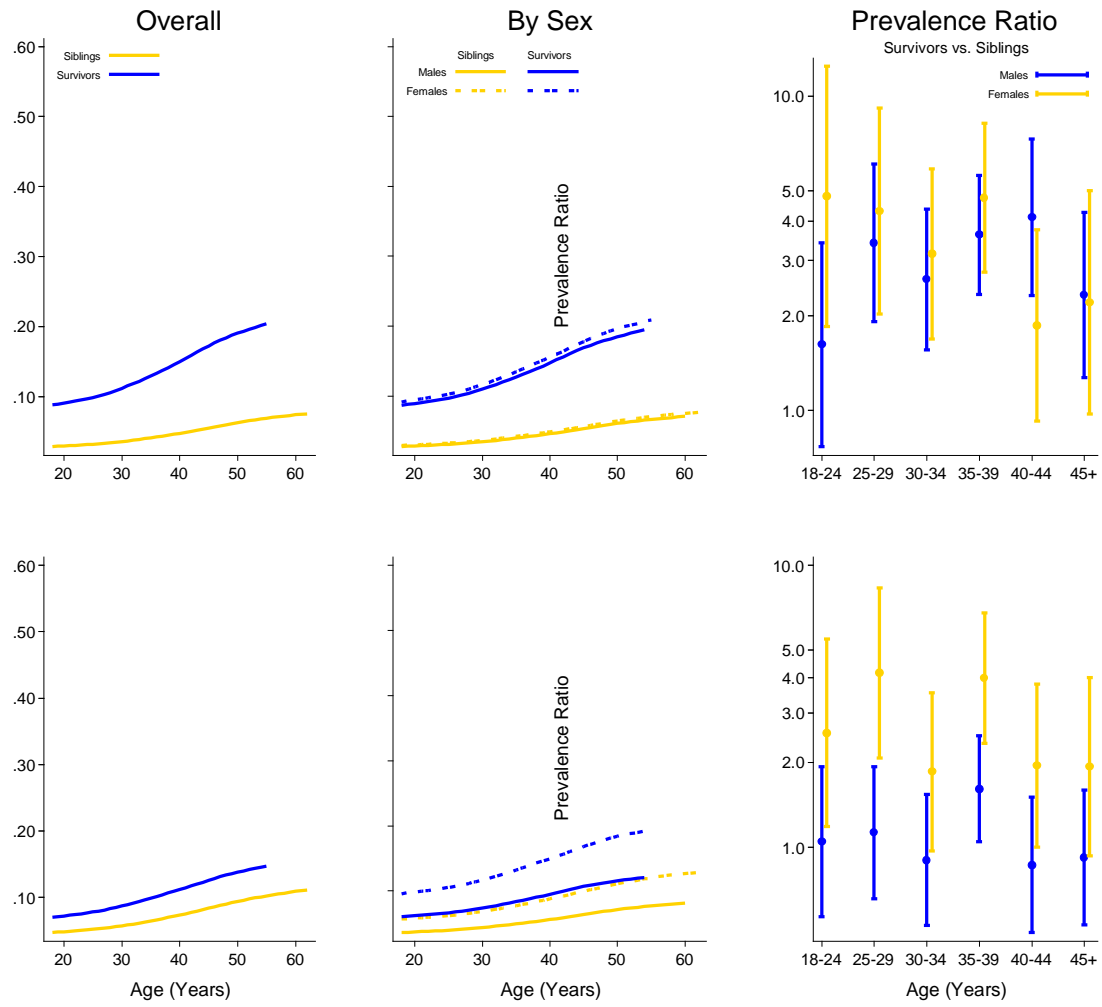

Figure 7 STS

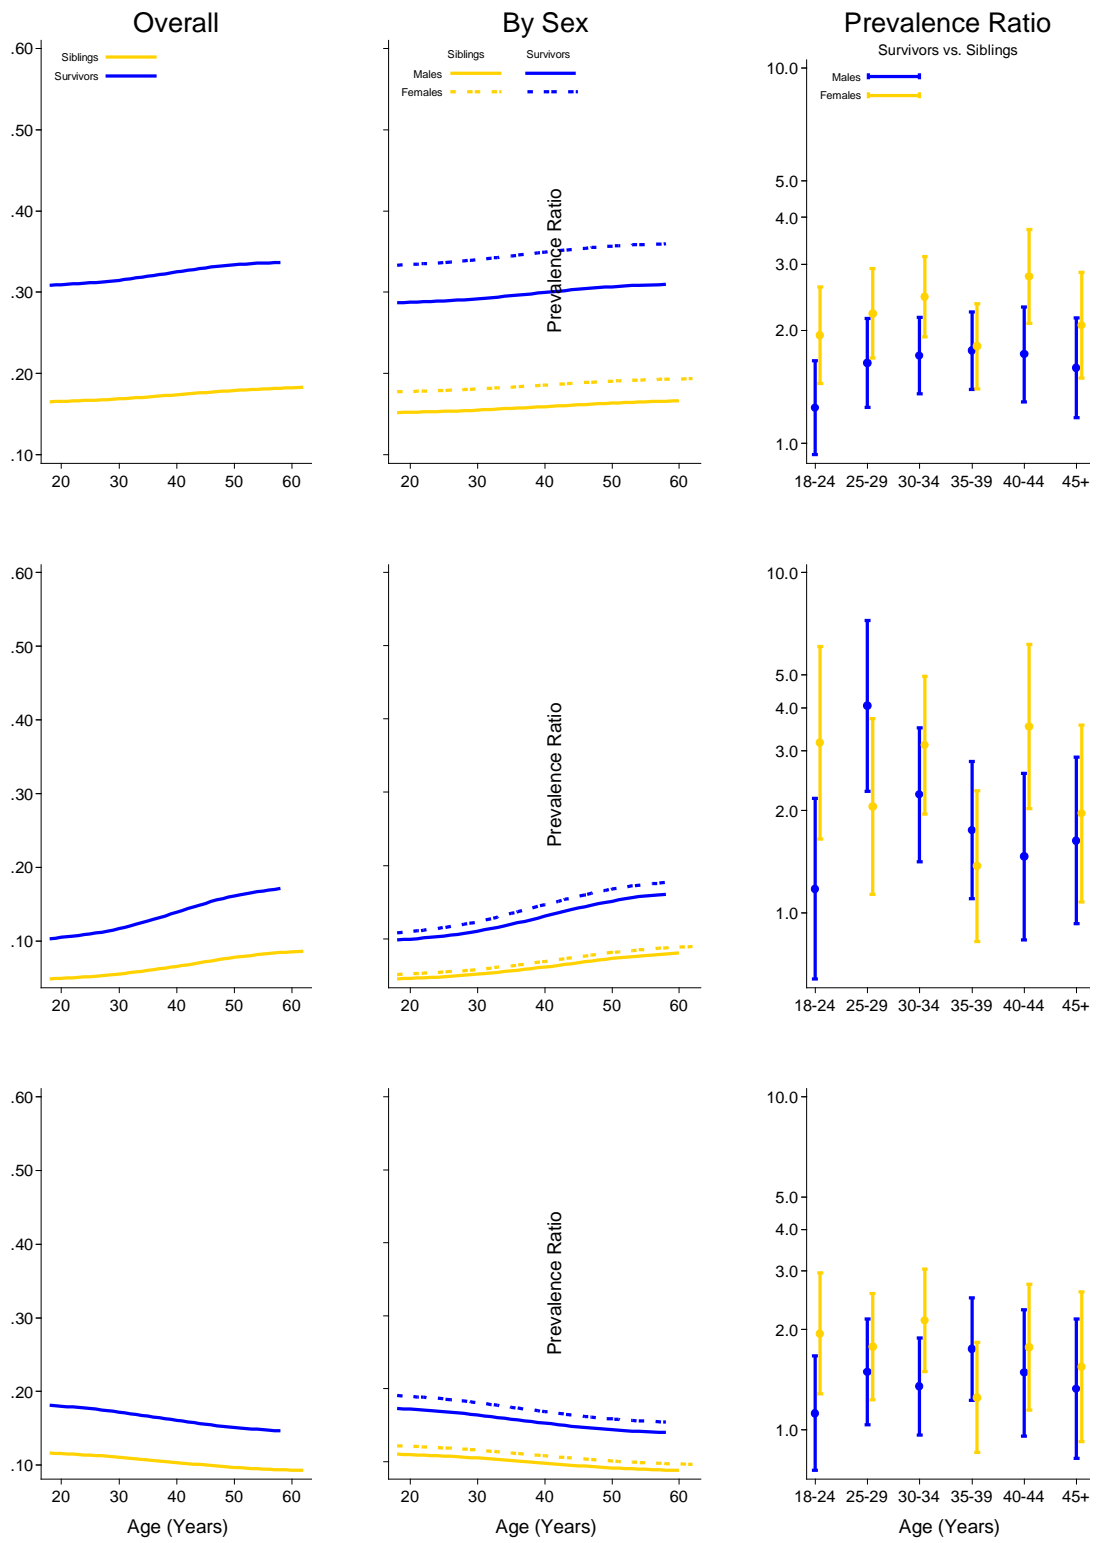

Figure 7 STS

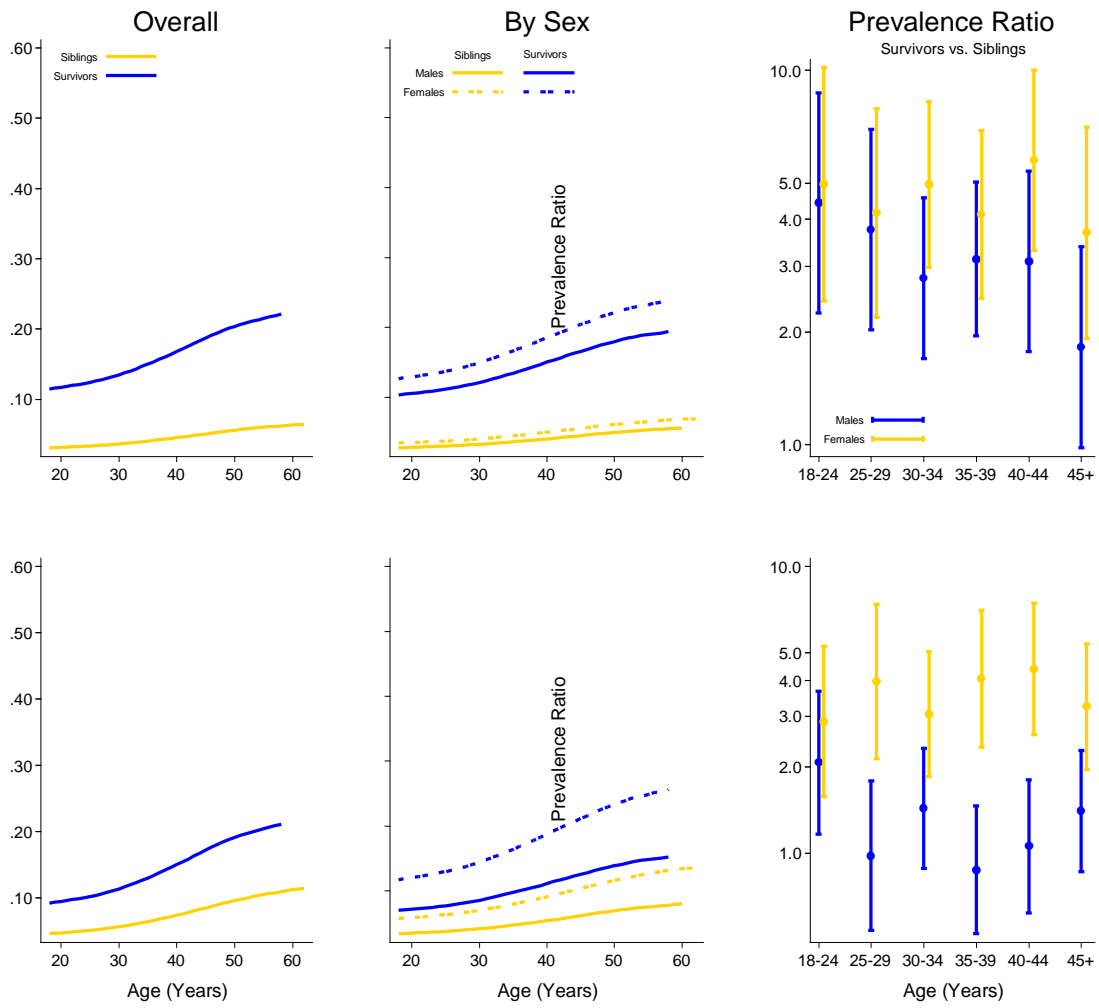

Figure 8 Wilms

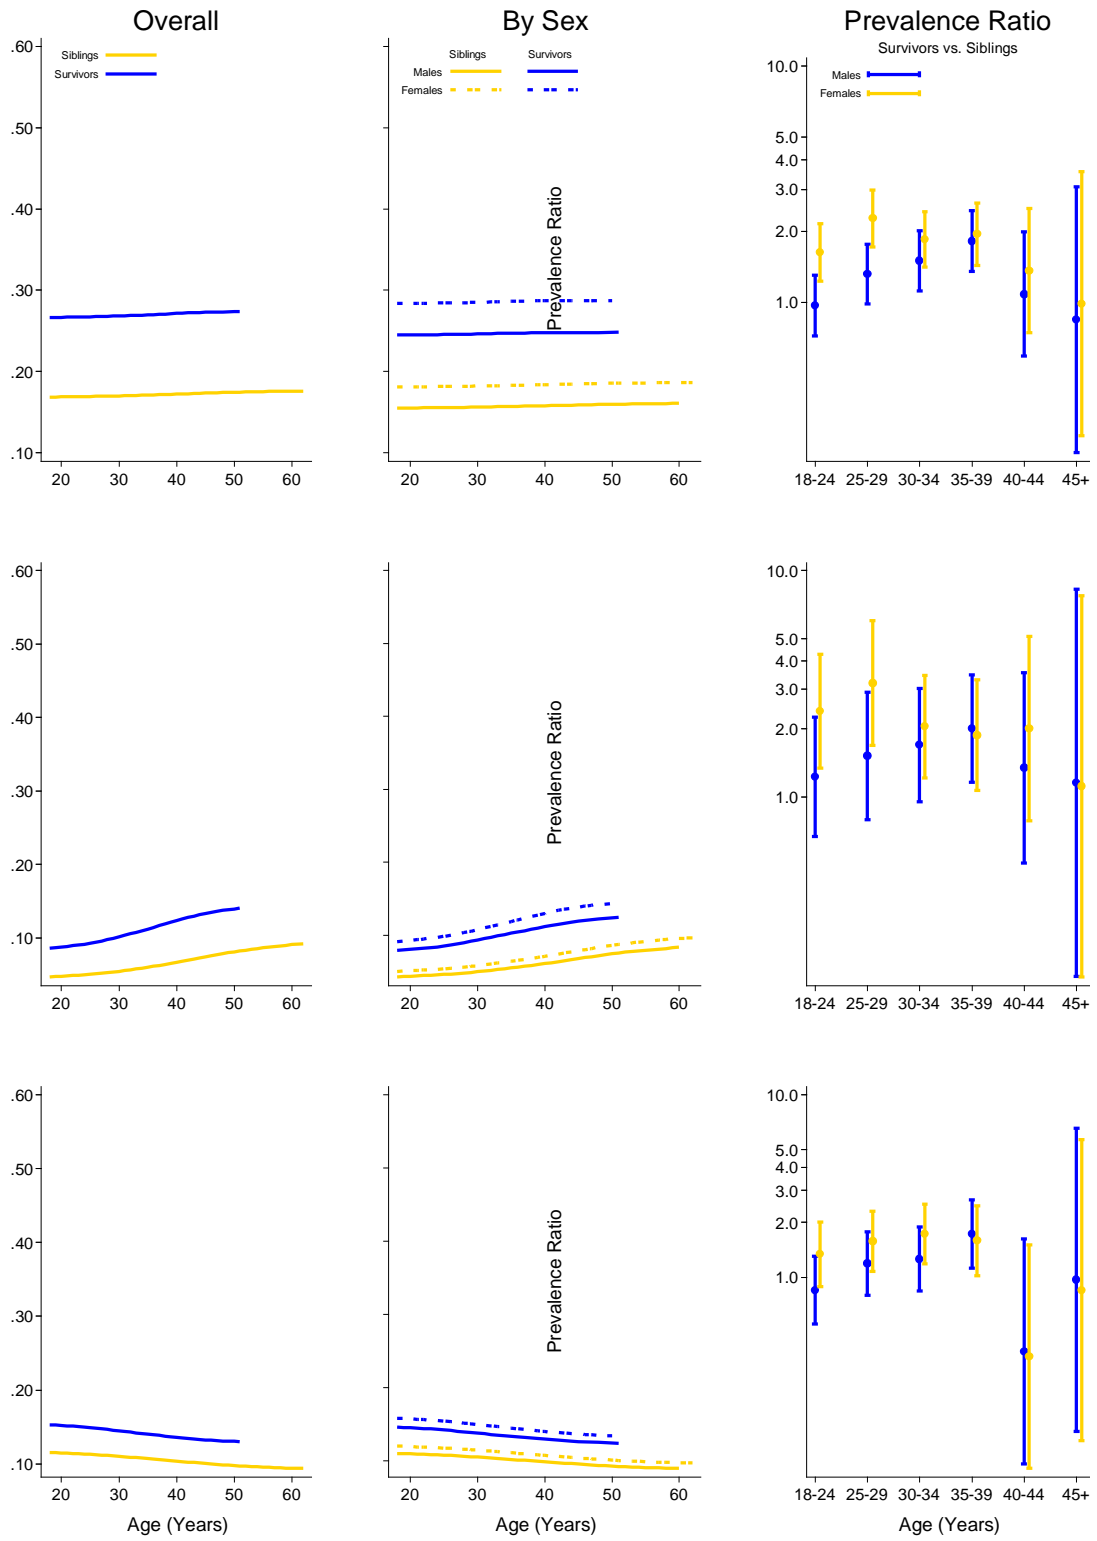

Figure 8 Wilms

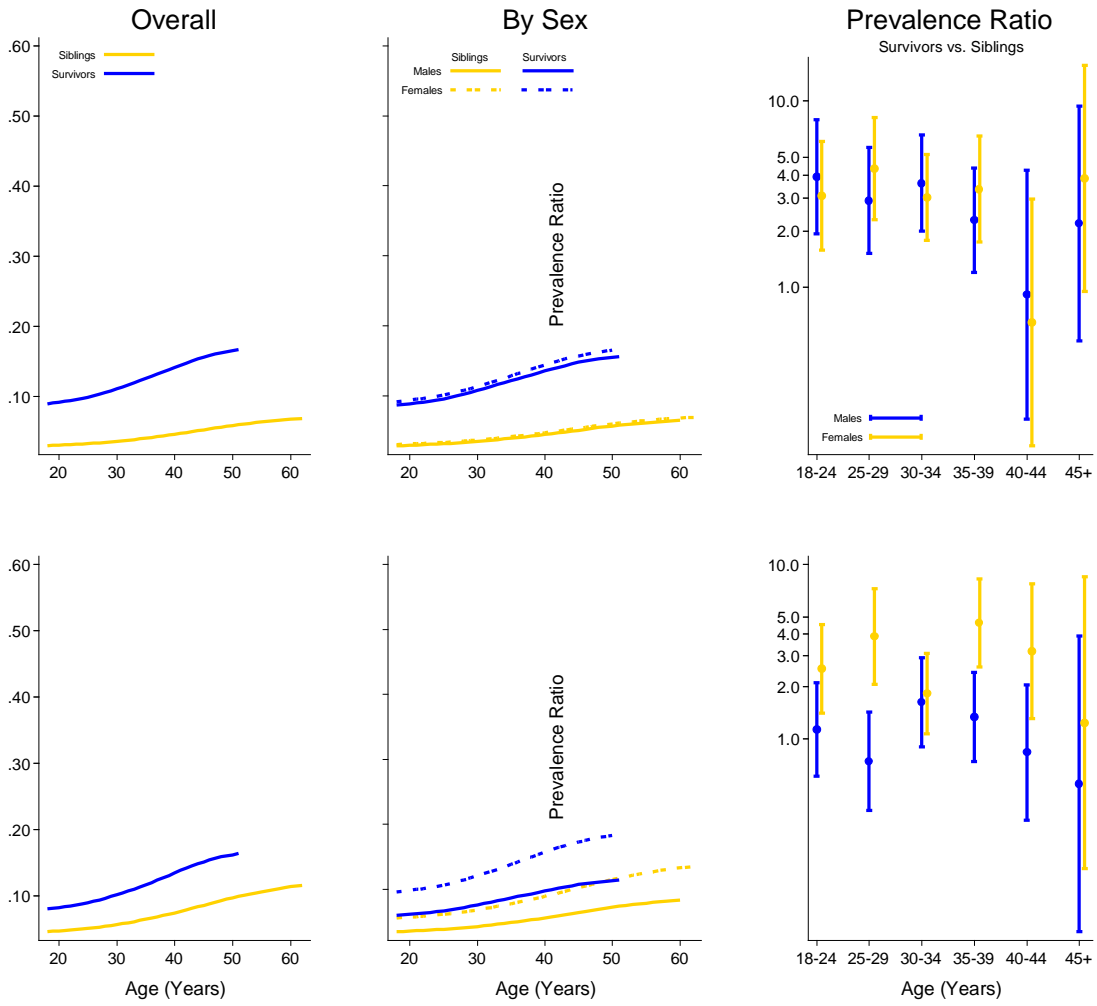

Supplement: supp_JCO.2014.57.4863_Data_Supplement_JCO.2014.57.4863.pdf [file supp_JCO.2014.57.4863_Data_Supplement_JCO.2014.57.4863.pdf]
